# Supplementary material
Source: PubMed Central journal article supplement (PMC3093549)
Supplement: mmc1.pdf [file mmc1.pdf]

## Supporting Material

### Protein Signaling Networks from Single Cell Fluctuations and Information Theory Profiling

Young Shik Shin,<sup>†§Δ</sup> F. Remacle,<sup>||Δ</sup> Rong Fan,<sup>##</sup> Kiwook Hwang,<sup>†‡</sup> Wei Wei,<sup>†¶</sup>  
Habib Ahmad,<sup>†‡</sup> R. D. Levine<sup>\*\*††</sup> and James R. Heath<sup>†‡\*</sup>

<sup>†</sup> Nanosystems Biology Cancer Center and Kavli Nanoscience Institute, <sup>‡</sup> Division of Chemistry and Chemical Engineering, <sup>§</sup> Division of Engineering and Applied Science, Bioengineering, <sup>¶</sup> Material Science, California Institute of Technology, 1200 East California Boulevard, Pasadena, CA 91125, USA

<sup>||</sup> Département de Chimie, B6c, Université de Liège, B4000 Liège, Belgium

<sup>\*\*</sup> The Institute of Chemistry, The Hebrew University of Jerusalem, Jerusalem 91904, Israel

<sup>††</sup> Crump Institute for Molecular Imaging and Department of Molecular and Medical Pharmacology, David Geffen School of Medicine, University of California, Los Angeles, CA 90095

<sup>##</sup> Department of Biomedical Engineering, Yale University, PO Box 208260, New Haven, CT 06520, USA

<sup>Δ</sup> These authors contributed equally to this work.

\*Correspondence: heath@caltech.edu (JRH)

Running Title: Proteins Fluctuations from Single Cell

The supporting material file has two main parts, 10 figures and 8 tables.

**Supplementary Experimental Methods (SI. I)** The experimental method and results.

**Supplementary Theory Methods (SI. II)** An outline of the theoretical methods.

**Figure S1.** Design of integrated microchip for single cell protein secretome analysis.

**Figure S2.** Cross-reactivity check and calibration curves.

**Figure S3.** Morphology change of THP-1 cells upon PMA/LPS activation and the cell viability test results.

**Figure S4.** Comparison of two data sets from two experiments performed in parallel.

**Figure S5.** PMA and LPS activation and kinetics of protein secretion from activated macrophage cells.

**Figure S6.** Simulated histograms of average intensity from multiple DNA barcode locations.

**Figure S7.** The eigenvalues of the covariance matrix, for the experimental data of the main text, in order of decreasing magnitude from samples containing  $n=1$  cells.

**Figure S8.** The dependence of the dominant eigenvalues of the covariance matrix on the number of cells in the sample.

## Proteins Fluctuations from Single Cell

**Figure S9.** Heat map of the covariance matrix (left) and of the contributions to the first two tiers of the network (right) for measurements on chambers containing 3 cells.

**Figure S10.** Heat map plots showing the secretion profiles of single cells when adding different neutralizing antibodies.

**Table S1.** Sequences and terminal functionalization of oligonucleotides.

**Table S2.** Summary of antibodies used for macrophage experiments.

**Table S3.** Digital data for the fluctuation in protein copy numbers for experiments with 1 cell in the chamber.

**Table S4.** Signal-to-noise ratio (S/N) for single cells in SCBC measurements.

**Table S5.** Parameters utilized for the protein assay calibration curve.

**Table S6.** Values of parameters used in simulation.

**Table S7.** The coefficients of variation for each of the assayed proteins from single cell experiments.

**Table S8.** Digital representation of the covariance matrix for 1 cell measurements.

## Supplementary Experimental Methods (SI. I)

### I. Experimental Procedure

**Microchip Fabrication.** The SCBCs were assembled from a DNA barcode microarray glass slide and a PDMS slab containing a microfluidic circuit (1, 2). The DNA barcode array was created with microchannel-guided flow patterning technique (2). Each barcode was comprised of thirteen stripes of uniquely designed ssDNA molecules. PDMS microfluidic chip was fabricated using a two-layer soft lithography approach (3). The control layer was molded from a SU8 2010 negative photoresist (~20  $\mu\text{m}$  in thickness) silicon master using a mixture of GE RTV 615 PDMS prepolymer part A and part B (5:1). The flow layer was fabricated by spin-casting the pre-polymer of GE RTV 615 PDMS part A and part B (20:1) onto a SPR 220 positive photoresist master at ~2000 rpm for 1 minute. The SPR 220 mold was ~18  $\mu\text{m}$  in height after rounding via thermal treatment. The control layer PDMS chip was then carefully aligned and placed onto the flow layer, which was still situated on its silicon master mold, and an additional 60 min thermal treatment at 80 °C was performed to enable bonding. Afterward, this two-layer PDMS chip was cut off and access holes drilled. In order to improve the biocompatibility of PDMS, we performed a solvent extraction step, which removes uncrosslinked oligomers, solvent and residues of the curing agent through serial extractions/washes of PDMS with several solvents (4, 5). We noticed that this step significantly improves the biocompatibility and the reproducible protein detection. Finally, the microfluidic-containing PDMS slab was thermally bonded onto the barcode-patterned glass slide to give a fully assembled microchip.

**Barcode Arrays.** The barcode array initially consists of 13 uniquely designed DNA strands labeled in order as A through M. Prior to loading cells, a cocktail containing all capture antibodies conjugated to different complementary DNA strands (A'-L') is flowed through the chambers, thus transforming, via DNA-hybridization, the DNA barcode into an antibody array. These dozen proteins that comprised the panel used here were encoded by the DNA strands A through L, respectively. Calibration and cross reactivity curves for each protein assay are in Fig. S2, The DNA oligomer sequences and the antibody pairs used are listed in Tables S1 and S2.

**Culture and stimulation of THP-1 cells.** We cultured human monocyte THP-1 cells (clone TIB 202) in RPMI-1640 (ATCC) medium supplemented with 10% fetal bovine serum and 10  $\mu\text{M}$  2-mercaptoethanol. Cells grown close to the maximum density ( $0.8 \times 10^6$  cells/mL) were chosen for the experiment. Cells were first treated with 100 ng/mL phorbol 12-myristate 13-acetate (PMA) for 12 hours during which a characteristic morphological change was noticed as an indication of the induction to the macrophages (Fig. S3). Cells were washed with fresh media and resuspended in media with PMA (100 ng/mL) and lipopolysaccharide (LPS, 200 ng/mL) at  $0.5 \times 10^6$  cells/mL for the further differentiation and the TLR-4 activation.

**On-chip secretion profiling.** Prior to loading cells on chip, the DNA barcode array was

## Proteins Fluctuations from Single Cell

transformed into an antibody microarray through the following steps. First, 1% bovine serum albumin (BSA) in phosphate buffered saline (PBS) was flowed and dead-end filled into the chip to block non-specific binding. Second, a 200- $\mu$ l cocktail containing all 12 DNA-antibody conjugates at 1.25  $\mu$ g/mL in 1% BSA/PBS buffer was flowed through all microfluidic channels for a period of 1 h. Then, 100  $\mu$ l of fresh buffer was flowed into the device to replace DNA conjugated primary antibody solutions. The chip is then ready for use. Cells stimulated with PMA/LPS were loaded into the SCBC chip within 10 min in order to minimize pre-loading secretion. Then, the pneumatic valves were pressed down by applying 15-20 psi constant pressure to divide 80 microfluidic channels into 960 isolated microchambers. Next, the cells in every microchamber were imaged under a Nikon LV100 microscope and their numbers were counted. Afterwards the chip was placed in a cell incubator ( $\sim 37^\circ\text{C}$  and 5%  $\text{CO}_2$ ) for 24 hours to perform on chip secretion. The chip was removed from the incubator and a 200  $\mu$ l cocktail containing all detection antibodies (each at 0.5  $\mu$ g/mL concentration) tagged with biotin flowed through the microchannels by releasing the valves. Then, 200  $\mu$ l of the fluorescent probe solution (1  $\mu$ g/ml Cy5-labeled streptavidin and 25 nM Cy3-labeled M' ssDNA) was flowed through to complete the immuno-sandwich assay. Finally, the PDMS slab was peeled off and the microarray slide was rinsed with 1 $\times$ PBS, 0.5 $\times$ PBS and DI water twice, sequentially, and spin-dried.

**Bulk secretion profiling.** Bulk measurements on the same panel of secreted proteins as were assessed within the SCBC microchambers were also carried out for the THP-1 cells with no stimulation, PMA stimulation, and PMA+LPS stimulation. Cells were cultured at  $0.3 \times 10^6$  cells/mL, a comparable density to a single cell in a chamber. The media were collected after 24 hours and the secreted proteins were detected as described below. For the PMA+LPS stimulation condition, the media were collected at multiple time points (2, 4, 6, 8, and 10 hours) for the time-dependent analysis as well. For the bulk test, SCBC chip was utilized without using valves for the microchannel to microchamber conversion. The same conditions as for the on-chip secretion profiling were applied except for the cell incubation step. Instead, the collected media was introduced to the channel sets and incubated for 3 hours in the incubator.

**Quantification and statistics.** All the barcode array slides used for quantification were scanned using an Axon Genepix 4400A two-color laser microarray scanner at the same instrumental settings—50% and 15% for the laser power of 635 nm and 532 nm, respectively. Optical gains are 500 and 450 for 635 nm and 532 nm fluorescence signals, respectively. The brightness and contrast were set at 90 and 93. The averaged fluorescence intensities for all barcodes in each chamber were obtained and matched to the cell number by custom-developed MATLAB (The MathWorks, Natick, MA) codes. Heat maps were generated using Cluster 3.0 and Java *treeview* (<http://rana.lbl.gov/EisenSoftware.htm>).

## II. Experimental Data Analysis Methods

**Conversion to the number of molecules.** The collected raw data is based on the fluorescence. In order to convert the fluorescence to the number of protein molecules, we used the calibration curves (Fig. S2). We used the four parameter logistic model which is commonly used for fitting ELISA calibration curve. The fitting parameters can be found from the Table S5.

$$y = \frac{A_1 - A_2}{1 + (x / x_0)^p} + A_2$$

**Signal- to- Noise Calculations.** Since the signal range highly depends on the activities of the antibodies as well as the cell biology, it is required to decide if the signal is real and reliable. Certain assayed proteins were identified as positively detected from single cells based upon signal-to-noise ratio (S/N), which was measured as follows: For each microchamber, the averaged fluorescence from the two barcode stripes used to capture and detect a given protein and the averaged fluorescence from the barcode stripes designed to capture and detect IL-2 were obtained. The ratio of the averaged values over all single cell experiments (specific protein to IL-2) yields a S/N value. An S/N of 4 was utilized as a minimum for positive detection. Eight secreted proteins were thus identified from the single cell measurements. Those proteins were (with S/N included in the parenthesis after the protein name): MCP-1 (4.65), MIF (1381.13), IFN- $\gamma$  (4.33), VEGF (77.32), IL-1 $\beta$  (94.70), IL-8 (2622.40), MMP9 (119.50), and TNF- $\alpha$  (410.74).

**Analysis of experimental and biological variation from SCBC-based single cell measurement.** One of the major characteristics of SCBC analysis is the heterogeneous cellular behavior at single cell level. The experimental variation of the SCBC platform which reflects the system error as well as the biological variation due to the cellular heterogeneity is contributing to the fluctuation of the total signal. Thus, we need to check if the heterogeneous signal responses are from the cells or the device itself.

The experimental error mainly includes the variation from non-uniform DNA barcode patterns and the variation due to the randomly distributed cell location in the chamber. The former one can be estimated by the histogram of the fluorescence intensity from the calibration experiment with recombinant proteins. Since the recombinant protein has fixed concentration over the entire channel, it represents a uniform protein level without any heterogeneity and location dependence. As a result, the distribution of the fluorescence intensity of a specific recombinant reflects the detection profile of the DNA barcode.

Fig. 1C shows a representative histogram of signal derived from recombinant MIF protein at 5 ng/ml. The histogram shows a nice Gaussian distribution with a coefficient of variation (CV) around 7%. In the calibration experiment, basically the intensities of all the recombinant proteins at detectable concentrations follow a Gaussian distribution with CVs typically lower than 10%.

## Proteins Fluctuations from Single Cell

The cell location is another important factor for the system error. Even though the chamber size is small, it is still big for a single cell. So the protein signal is dependent on diffusion and that is why the cell location can be a source of the variation. In order to minimize this effect, we utilized two sets of barcodes in a chamber and used the averaged signal intensity from two barcodes as the final signal value. However, the barcode close to the cell will undergo a higher local protein concentration than its counterpart and the different intensities of two sets of barcodes are amplified during the long incubation time. The diffusion process will lead the system close to the equilibrium but the cell that keeps secreting proteins with different kinetics makes it difficult for the chamber to reach its full equilibrium. In that sense, the randomly located cells can add an extra uncertainty to the SCBC system.

Because it is difficult to isolate the system error (especially for the cell location effect) from the heterogeneous cell response experimentally, we performed a Monte Carlo simulation by R (R Foundation for Statistical Computing, version 2.10.1). First of all, we investigate the case of MIF as a representative case. We assumed one chamber has two sets of 13 barcodes such that all of them have MIF antibodies. By randomly positioning a cell with a fixed protein secretion rate and getting the protein concentration at specific barcode positions, we can find out what is the variation that purely depends on the cell location and barcode non-uniformity. The total amount of secreted MIF during 24 hours was estimated based on our experimental result. The secretion rate was 4.84 pg/mL per min from the SCBC (used for the simulation) and 11 pg/mL per min from the bulk condition. The corresponding secretion rate of a single cell, back-calculated based on the chamber and cell size ( $10\mu\text{m}^3$ ), was 0.065 nM/min. Values of parameters used in simulation can be found from Table S6. 5000 data sets for the protein concentration distributions from randomly located single cell were generated by solving a diffusion equation with a custom made MATLAB code and the results were analyzed with R. The parameters used in the simulation are exactly the same as our experimental environment. The chamber is 2000  $\mu\text{m}$  in length and 100  $\mu\text{m}$  in width with two sets of DNA barcodes M-A and A-M from left to right. Each barcode is 20  $\mu\text{m}$  in width with 50  $\mu\text{m}$  in pitch (30 $\mu\text{m}$  gap between barcodes). The detection variation of the MIF protein due to the DNA uniformity obtained from the histogram of the calibration data set was incorporated to the analysis. Fig. 1E shows the histogram of the average fluorescence intensity from DNA sequence E (corresponding to MIF in the actual experiment) for 5000 single cell cases. For the barcode variability, the actual value of 7.3% was used. The final system error was 5.1% which is a lot smaller than the assay error from the experimental data sets, 55.2 %.

In order to think of the worst case, we used the barcode variability of 10% for the rest of the analysis. If the cell location effect is significant, we are supposed to see different errors on different barcode positions. Fig. S6 illustrate the histograms of average intensities from multiple barcode locations. The blue curves are line profiles of Gaussian distribution fitted with the mean and the standard deviation obtained from the corresponding simulation. The nice fitting between the Gaussian

## Proteins Fluctuations from Single Cell

curves and the histogram indicates that the average intensity per chamber follows a Gaussian distribution with a predictable mean and CV. The CVs from this simulation represent the distribution of our measurements for single cell chambers without considering the cellular heterogeneity, i.e. the system error. The experimental CVs for different barcode locations based on the system error were quite similar to one another ( $\sim 7\%$ ).

We can define  $CV_{\text{system}}$  as the system error estimated by the simulation. We can also calculate the assay error from our experimental data set such that  $CV_{\text{assay}}$  refers to the total CV of our experimental data. Consequently, the biological variation for single cell experiment can be quantitatively estimated by the formula below:

$$CV_{\text{assay}} = (CV_{\text{system}}^2 + CV_{\text{biological}}^2)^{1/2}$$

An estimation of biological variations of proteins for different barcode locations are shown in Table S7. It can be noticed that the biological variation is dominant in the total error of the assay. This analysis verifies that the signal fluctuation that we can see from the single cell experiment is a good representation for the single cell heterogeneity rather than the systemic error from our platform.

## Supplementary Theory Methods (SI.II)

### I. Introduction to theoretical supplementary methods

We show how to characterize protein-protein interactions. Specifically we show (i) that the different tiers of a signaling network can be quantitatively determined from the measured fluctuations in the concentrations of signaling proteins and (ii) that the measured fluctuations in the concentrations of signaling proteins for the unperturbed cell can be used to predict the effect of introducing perturbations such as neutralizing antibodies. The approach is developed from an information theoretic perspective and it is related to the specification of the direction of change when a system responds to a perturbation, known as the principle of Le Chatelier. The corresponding result here is that we predict the sequence of tiers in the network, see Fig. 4 of the article. In addition we specify which signaling proteins are at a given tier of the network and their mutual influence including inhibition, see Fig. 5 of the article. Experimental measurements of the fluctuation of concentrations in samples with nanoliter volume containing  $n$  cells,  $n = 0,1,2,\dots$ , see Fig. S8 below, are used to validate the signaling protein network. Finally we use the protein-protein interaction as determined for the unperturbed cell to quantitatively predict, Fig. 6 of the article, the effect of perturbations.

The approach we propose provides an analogue and an extension of the statement that heat is transferred from a warmer to a colder body. We can understand this statement as a statement about the direction of a process between two equilibrium states, meaning that it is a

static principle. We can also think of it as a statement about the dynamics, meaning that it specifies the rate of change. We will here develop the formalism for the static interpretation. The explicit introduction of time is possible and we have the required formalism at hand but it requires a more elaborate theoretical foundation and so will be given elsewhere.

### II. The ensemble: a basis for making predictions

The system we consider is many independent replicas of a compartment containing a single cell in a nutrient solution at thermal equilibrium. Because the system is not large, different replicas of it can differ in the number,  $N_i$ , of secreted proteins of kind  $i$ . We seek to represent these fluctuations by taking the different replicas as different samples from an ensemble of single cell compartments where the mean number  $\bar{N}_i$  of proteins of kind  $i$  over the ensemble is given. Another given quantity is the energy, (and volume that we do not indicate explicitly). We now seek the most probable distribution of protein numbers in different compartments. The solution is well known because if many compartments are measured then the required distribution is the one whose entropy is maximal. In textbooks of statistical mechanics this search for the most probable distribution is sometime called the Boltzmann approach. It is possible to show (6) that this approach does not require the system to be macroscopic in size. It is sufficient if we measure enough replicas so that the distribution of proteins does not significantly change as we add more measurements. If each replica is macroscopic the fluctuations will be small and rare. Repeated measurements will give the same results. If each replica is small we can observe the fluctuations, which is the experiment described in the main text.

The key point is that even if the fluctuations are not small it is possible to make predictions. We discuss three types of predictions in the paper, with more details given in this section of the SI. We predict the distribution of fluctuations, we predict the tiers in the network and, in particular and as shown in Fig. 6 of the main text, we predict the response of a system to a perturbation. For these first and last predictions, we compare directly with experimental results. We emphasize that the prediction is made strictly independently of the experiment to which it is compared.

The probability of a system in a particular composition can be shown to be given by

$$P(N_1, N_2, \dots) = \exp\left\{\beta(\sum_i \mu_i N_i - E)\right\} / \Xi \quad (\text{S1})$$



This straightforward result is perhaps misleading in its simplicity. It is most directly derived by the method of Lagrange undetermined multipliers. The numerical value of these multipliers is determined at the final stage by imposing the condition that the distribution (Eq. S1) reproduces the given values of the means. There are as many multipliers as conditions.

$\beta$  is the Lagrange multiplier that is determined by the mean value of the energy and, as usual, is related to the temperature  $T$  as  $\beta = 1/kT$  where  $k$  is Boltzmann's constant. The  $\mu_i$ 's are the chemical potentials as introduced in the thermodynamics of systems of more than one component (7, 8). The Lagrange multipliers that correspond to the given (mean) number of species  $i$  are known as the Planck potentials and denoted as  $\alpha_i$ . It is often more convenient to work with  $\mu_i$ ,  $\alpha_i = \beta\mu_i$ . If our system were macroscopic in size we would call  $\mu_i$  'the chemical potential of protein  $i$ '. For convenience we retain the designation 'potential' because, as we shall show,  $\mu_i$  retains essential properties of the chemical potential even when fluctuations are finite.  $\Xi$  is a function of all the Lagrange multipliers and its role is to insure that the sum of the probability over all possible compositions yields one.

There are at least two points where important details are not revealed by the notation used in Eq. S1. Both are relevant in what follows. First is the condition that the numerical values of the chemical potentials are determined by the given mean numbers, the  $\bar{N}_i$ 's, of the proteins. Strictly speaking, we should write the chemical potentials as functions of the  $\bar{N}_i$ 's. The other point arises when we want to treat the actual numbers  $N_i$ 's of the different proteins as continuous variables. This is needed, for example, to compute averages, normalize the distribution (Eq. S1), etc. The integration for each protein is over  $dN/N!$  where  $N!$ , the factorial of  $N$ , arises to account for the Gibb's paradox. Therefore, as a function of the continuous variable  $N$  the distribution for, say, one protein is

$$P(N) \propto \left( Q^N / N! \right) \exp(-\beta\mu N) \quad (\text{S2})$$

Here  $Q$  is the factor that arises by summing over all the internal states of the protein that are occupied at the temperature  $T$ . This result is used in the main text to fit the observed distribution for a single protein (Fig. 3).

### III. Fluctuations describe the response to small perturbations.

We show that by measuring the fluctuations in the unperturbed system we can predict how the system responds to small perturbations (7). Proof: Say that we make a small change in the value of the chemical potential  $\mu_i$  from its current equilibrium value to some new value  $\mu_i + \delta \mu_i$ . We do so isothermally. This change in  $\mu_i$  potentially changes the equilibrium mean concentration of all species from  $\bar{N}_j$  to  $\bar{N}_j + \delta \bar{N}_j$ , for all  $j$ . To compute the change in concentrations we need to consider the change in the ensemble as represented by Eq. S1. In the algebraic developments in Eq. S4 below we make use of the definition of the mean concentration

$$\bar{N}_j = \sum N_j P(N_1, N_2, \dots) \quad (\text{S3})$$

The summation in Eq. S3 is over all the possible compositions, each weighted by its probability  $P(N_1, N_2, \dots)$  computed as the distribution of maximal entropy. The same meaning for the summation is used also in Eq. S4 below. We denote this averaging by an over bar. From Eq. S1, the variation of the distribution that occurs when a particular chemical potential is changed by a small amount is  $\delta P(N_1, N_2, \dots) = \beta \delta \mu_i N_i P(N_1, N_2, \dots)$ . Note that it is in using this lowest term in the Taylor series that we assume that the change is small. It follows that on the average the proteins respond to the change as:

$$\begin{aligned} \delta \bar{N}_j &= \sum N_j \delta P(N_1, N_2, \dots) \\ &= \sum (N_j - \bar{N}_j) \delta P(N_1, N_2, \dots) \\ &= \beta \delta \mu_i \sum (N_j - \bar{N}_j) N_i P(N_1, N_2, \dots) \\ &= \beta \delta \mu_i \sum (N_j - \bar{N}_j) (N_i - \bar{N}_i) P(N_1, N_2, \dots) \\ &= \beta \delta \mu_i \overline{(N_j - \bar{N}_j)(N_i - \bar{N}_i)} \end{aligned} \quad (\text{S4})$$

Note that the conservation of normalization implies that the average change in the probability must be zero,  $0 = \sum \delta P(N_1, N_2, \dots)$  and we have used this result in the derivation above. In the last line in Eq. S4 we have avoided writing the summation over all compositions by the use of the over bar to designate an average over the probability  $P(N_1, N_2, \dots)$ , which is the notation introduced in Eq. S3.

Taylor theorem states that, in the leading order, the change of a function is the sum of the changes. Therefore the expression for an isothermal variation in all the chemical potentials leads to a change of the distribution of the form:

$$\delta P(N_1, N_2, \dots) = \beta \sum_i N_i P(N_1, N_2, \dots) \delta \mu_i \quad (\text{S5})$$

The summation in Eq. S5 is an ordinary sum over the finite number  $S$  of signaling proteins,  $i = 1, 2, \dots, S$ . Then we have the general equation of change that is an extended form of Eq. S4 valid for all possible small isothermal changes in the chemical potentials

$$\delta \bar{N}_j = \beta \sum_i \overline{(N_j - \bar{N}_j)(N_i - \bar{N}_i)} \delta \mu_i \quad (\text{S6})$$

This is the result that we use in this paper.

#### IV. The principle of Le Chatelier

The principle in its simplistic statement claims that the system responds to a perturbation in a direction that restores equilibrium. For example, when the temperature of a heat bath is increased the mean energy of an immersed system goes up so that the distribution remains canonical. The proof for our case starts from Eq. S3. When the chemical potential of protein  $i$  is changed, for an ensemble at maximal entropy the mean value of protein  $j$  changes by

$$\frac{\partial \bar{N}_j}{\partial \mu_i} = \sum N_j \frac{\partial P(N_1, N_2, \dots)}{\partial \mu_i} \quad (\text{S7})$$

where, as emphasized in Eq. S3, the distribution  $P(N_1, N_2, \dots)$  is not arbitrary but is the one of maximal entropy as exhibited in Eq. S1. Eq. S4 is recovered when the derivative in Eq. S7 is evaluated. The reader may feel that this is a triviality but it is not without meaning. What we have proven is that computing a small change in the distribution  $P(N_1, N_2, \dots)$  when a particular chemical potential is changed from the value  $\mu_i$  to a new value  $\mu_i + \delta \mu_i$  is the same as computing the derivative of the distribution  $P(N_1, N_2, \dots)$  at the point where the value of the chemical potential is  $\mu_i$ . Then the change in the distribution is  $(\partial P(N_1, N_2, \dots) / \partial \mu_i) \delta \mu_i$ . Of course, this is what differential calculus is about. Yet the result is not pure mathematics. It shows that the new distribution is a distribution of maximal entropy of the functional form Eq. S1 as otherwise the result will not hold. It says that a small change in the chemical potential  $\mu_i$ , and no other change, leads to a new distribution which is also one of maximal entropy.

Typically we do not see the theorem of Le Chatelier stated as in Eq. S6. This is because of the practical point that the number fluctuations are typically not easy to observe in

a macroscopic system. Here however we deal with secretion of proteins by a single cell and, as shown in the main text and particularly in the histogram in Fig. 3, the distribution is clearly observed and the covariance can be computed from the experimental data as long as that the number of replicas is not small.

## V. The equation for the direction of change

The (symmetric) square matrix  $\overline{(N_j - \bar{N}_j)(N_i - \bar{N}_i)}$  is the covariance matrix of the (equilibrium) fluctuations in the (equilibrium) concentrations, the  $\bar{N}_j$ 's. It is an equilibrium average because, as explicitly shown in Eq. S4, it is an expectation over the equilibrium distribution as given in Eq. S3. The covariance matrix has the dimensions of  $S$  by  $S$  where  $S$  is the number of signaling molecules that take part. In practice we have to compromise on this definition meaning that  $S$  is the number of signaling molecules that can be detected. If an important protein is not detected then the network that we infer will be incomplete.

A covariance matrix can be shown to be a non-negative matrix, also called semipositive definite, meaning that its eigenvalues are zero or positive. If the concentrations of the signaling proteins can in principle be varied independently, which is definitely not necessarily the case, then the covariance matrix  $\overline{(N_j - \bar{N}_j)(N_i - \bar{N}_i)}$  is a positive matrix with positive eigenvalues. We will discuss below why it will often be the case that for reasons of both principle and practice (e.g., experimental noise) there will be eigenvalues that are effectively zero. In that case, technically, the covariance matrix is positive semidefinite (9).

Eq. S6 specifies how the concentration of the  $j$ 'th signaling molecule varies when the  $i$ 'th chemical potential is changed. In general the correlation coefficient  $\overline{(N_j - \bar{N}_j)(N_i - \bar{N}_i)}$  between the signaling molecules  $i$  and  $j$  can be either positive or negative. Therefore, in general the change  $\delta \bar{N}_j / \delta \mu_i$  is not necessarily of the same direction for all proteins  $j$ . This obvious result will be important for us below. Using the observation that the covariance matrix is semipositive definite, it is however possible to determine the direction of change by first diagonalizing the covariance matrix. This means that we can determine  $S$  distinct linear combinations of signaling molecules, where (a) each such set of molecules changes in a given direction and (b) we can order the different sets in terms of the extent of their response such that the first set is the most changing, the second set changes to a lesser extent, etc. In

the time dependent formalism, not presented here, we can outright say that the first set is the fastest changing and therefore it is the first to change. Then there follow changes in the second set, etc. It is clearly our intention to identify each set of signaling molecules as the set of molecules in a given tier in the network.

## VI. Tiers of the network are eigenvectors of the correlation matrix

Our next purpose is to define the tiers of the network. The set of proteins that participate in the  $m$ 'th tier is determined as follows. Let  $\mathbf{S}_m$  designate the  $m$ 'th eigenvector of the covariance matrix where the eigenvectors are listed in order of decreasing magnitude of the corresponding eigenvalue. The largest eigenvalue is  $m = 1$ . Each eigenvector  $\mathbf{S}_m$  is a (column) vector of  $S$  components and it is determined by the matrix equation

$$\mathbf{\Sigma} \mathbf{S}_m = \sigma_m^2 \mathbf{S}_m \quad , \quad m = 1, 2, \dots \quad (\text{S8})$$

where  $\mathbf{\Sigma}$  is the  $S$  by  $S$  symmetric covariance matrix whose elements are  $\Sigma_{ij} = \overline{(N_j - \bar{N}_j)(N_i - \bar{N}_i)}$  and we explicitly indicated that the eigenvalues are positive or zero but not negative (which defines a positive semidefinite matrix). The eigenvectors of the symmetric covariance matrix are orthogonal to one another and can be chosen to be normalized

$$\mathbf{S}_{m'}^T \cdot \mathbf{S}_m = \begin{cases} 0, & m' \neq m \\ 1, & m' = m \end{cases} \quad (\text{S9})$$

Here the superscript  $T$  designates the transpose so that  $\mathbf{S}_{m'}^T$  is a row vector and Eq. S9 is the scalar product.

For each value of the number of cells,  $n$ , in the compartment the eigenvalues are arranged in the order of decreasing magnitude the largest eigenvalue being labeled as  $m = 1$  and the smallest as  $m = 12$  and the results are shown for  $n = 1$  in Fig. S7. See Fig. S8 for the dependence of the largest eigenvalues vs. cell number.

## VII. The spectral representation of the covariance matrix.

Fig. 5 of the text shows the covariance matrix computed for experiments with one cell in the compartment. Table S8 is a digital representation of the same matrix.

Also shown in Fig. 5 is the resolution of the covariance matrix into tiers defined as follows. From each eigenvector  $\mathbf{S}_m$  we can define an  $S$  by  $S$  symmetric matrix  $\mathbf{P}_m$  as follows

$$\mathbf{P}_m = \mathbf{S}_m \cdot \mathbf{S}_m^T \quad (\text{S10})$$

The spectral theorem (10) is the result that the covariance matrix  $\Sigma$  can be resolved into tiers as

$$\Sigma = \sum_m \sigma_m^2 \mathbf{P}_m \quad (\text{S11})$$

The eigenvalues  $\sigma_m^2$  are arranged in a decreasing order so that each subsequent tier makes a smaller contribution. Fig. S7 shows that the eigenvalues decrease quite rapidly with increasing value of  $m$ . The very dominant contribution is from  $m=1$ . The leading eigenvalue = tier 1, is only about 30% bigger than the second one,  $m=2$ . The third eigenvalue is smaller by almost two orders of magnitude. Fig. S8 is a plot on a logarithmic scale of all non zero eigenvalues. There are only two eigenvectors that, judging by the value of their corresponding eigenvalues are definitely above the noise. The dominant ( $m=1$ ) and the  $m=2$  eigenvectors for 1 cell measurements are shown in Fig. 5 of the text and for three cells in Fig. S9 below.

### VIII. The role of the number of cells in the sample

It was possible to make repeated measurements of the protein concentrations for different values of the number of cells in the sample. In this section we argue that the direction of increasing  $n$  can be semi-quantitatively regarded as a direction of increasing time. Therefore by examining how the eigenvectors of the covariance matrix change with  $n$  we have an independent determination of the direction of the *dynamic* response of the system.

Fig. S8 shows are the largest eigenvalues for  $n = 0, 1, 2, 3$  and 4 cells.

To interpret Fig. S8 within the point of view as used in this paper we argue as follows. A single cell secretes a number of different signaling proteins and therefore even the data measured for a single cell can show the role of protein-protein interactions. If two cells are in the sample these interactions increase in importance. If we think of  $n$  as a measure of concentrations of proteins then  $\bar{N} \propto n$  but to compute the covariance we need to divide by the number of protein molecules. So for both paracrine and endocrine signaling we expect the covariance to increase with  $n$ . When  $n$  becomes high there may be three or more cells interacting and the simple considerations break down.

### IX. Antibody perturbations

Fig. 6 shows a quantitative comparison of the measured results as compared to the purely theoretical prediction when neutralizing antibodies for specific proteins are added. We emphasize that it is a prediction because the results shown are based on using Eq. S4 that we repeat here:

$$\delta \bar{N}_j = \beta \overline{(N_j - \bar{N}_j)(N_i - \bar{N}_i)} \delta \mu_i = \beta \Sigma_{ji} \delta \mu_i$$

The addition of a neutralizing antibody for protein  $i$  means that  $\delta \mu_i$  is negative. The entries for the matrix  $\Sigma$  are given in Table S3. This matrix is computed for the unperturbed data. It is the matrix given in the table above that gives rise to the theoretical results shown in Fig. 6. We emphasize that the experimental results shown in Fig. 6 are for single cells in the compartment. This means, see Fig. S8 that the largest eigenvalue,  $\sigma_{m=1}^2$ , of the covariance matrix is large indeed. Then, from Eq. S11, the contribution from the first tier dominates. It is the two proteins in this tier that are shown in the panel. There are bigger discrepancies between theory and experiment for tiers 2 or 3 for which the experimental signal is weak.

## Supplementary Figures

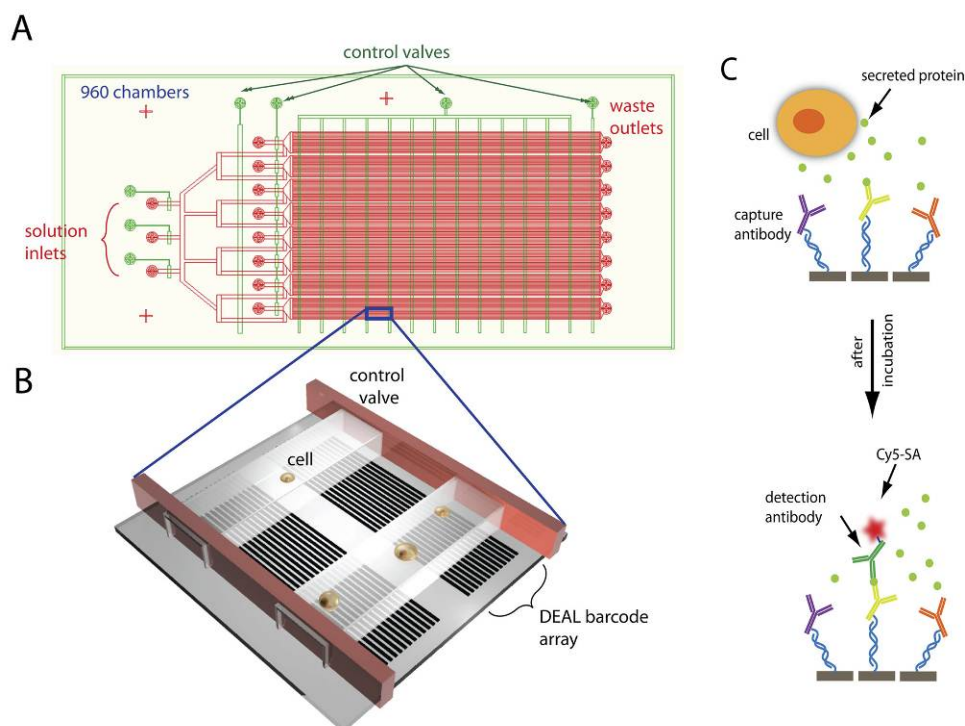

**Figure S1.** Design of integrated microchip for single cell protein secretome analysis. (A) CAD design of a microchip in which flow channels are shown in red and the control channels are shown in green. (B) Schematic drawing of cells loaded in the microchambers and compartmentalized with the valves pressurized. (C) Schematic illustration of the antibody barcode array used for multiplexed immunoassay of single cell secreted proteins.

## Proteins Fluctuations from Single Cell

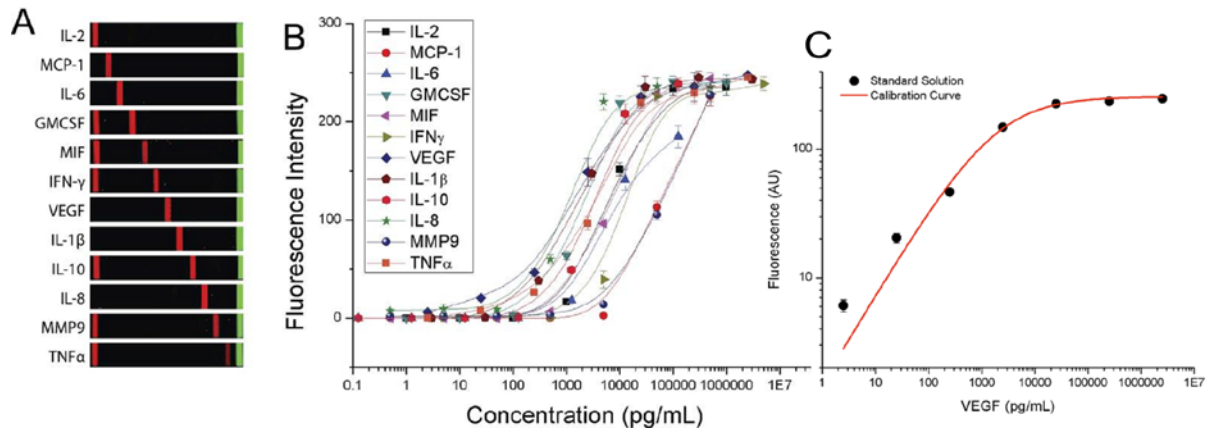

**Figure S2.** Cross-reactivity check and calibration curves. (A) Scanned image showing cross-reactivity check for all 12 proteins. The green bars represent the reference stripe, sequence M. Each protein can be readily identified by its distance from the reference. In each channel, a standard protein (indicated on the left) was added to the buffer solution and assayed using the DEAL barcode method. For GMCSF, MIF, IFN- $\gamma$ , IL-10, MMP9, and TNF- $\alpha$ , biotin-labeled 2 $^{\circ}$  anti IL-2 antibody conjugated to DNA sequence A' was used as a control. (B) Quantitation of fluorescence intensity vs. concentration for all 12 proteins. Error bars: 1SD. The variability (defined as the standard deviation divided by the average in percentage) is less than 10% for the signals in detectable range. (C). Plot of the same VEGF calibration data as in (B), but presented as a log / log scale, which may be more familiar to some readers.



## Proteins Fluctuations from Single Cell

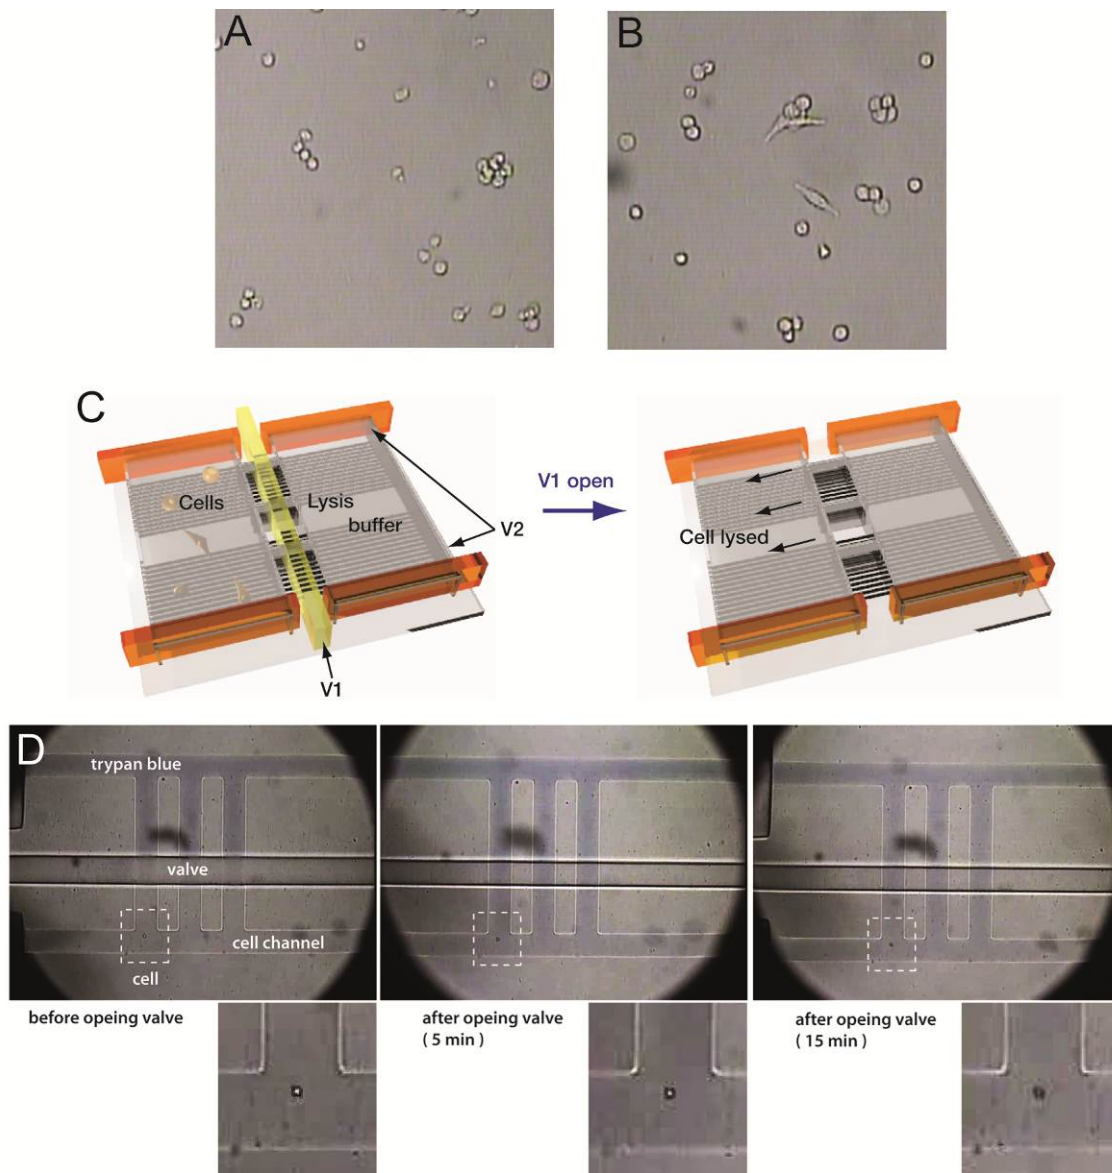

**Figure S3.** Morphology change of THP-1 cells upon PMA/LPS activation for 24 hours, and on-chip cell viability assay. (A) monocytic THP-1 cells without induction, (B) macrophage-like THP-1 cells after PMA/LPS treatment. The morphological change from non-adherent to adherent phenotypes was observed upon PMA/LPS treatment. (C) Schematic illustration of the device for cell viability test. The device has two parallel channels connected through three interconnecting channels. One channel is used for cell loading and the other channel is filled with trypan blue. Valve set V1 separates the cell loading channel and the trypan blue channel. Valve set V2 is for converting channels into chambers. After 24 hours of incubation, valve set V1 opens and trypan blue mixes with the cell media by diffusion. The cell viability is checked by the color change of the cells. (D) A representative picture of the cell viability test result. 5 min (sufficient time for diffusion mixing) after valve opening, a cell still doesn't get stained, which indicates cells can survive for 24 hours in the microfluidic device. After long exposure (15 min) to the trypan blue, cell color changes into dark blue due to the toxicity of trypan blue.

## Proteins Fluctuations from Single Cell

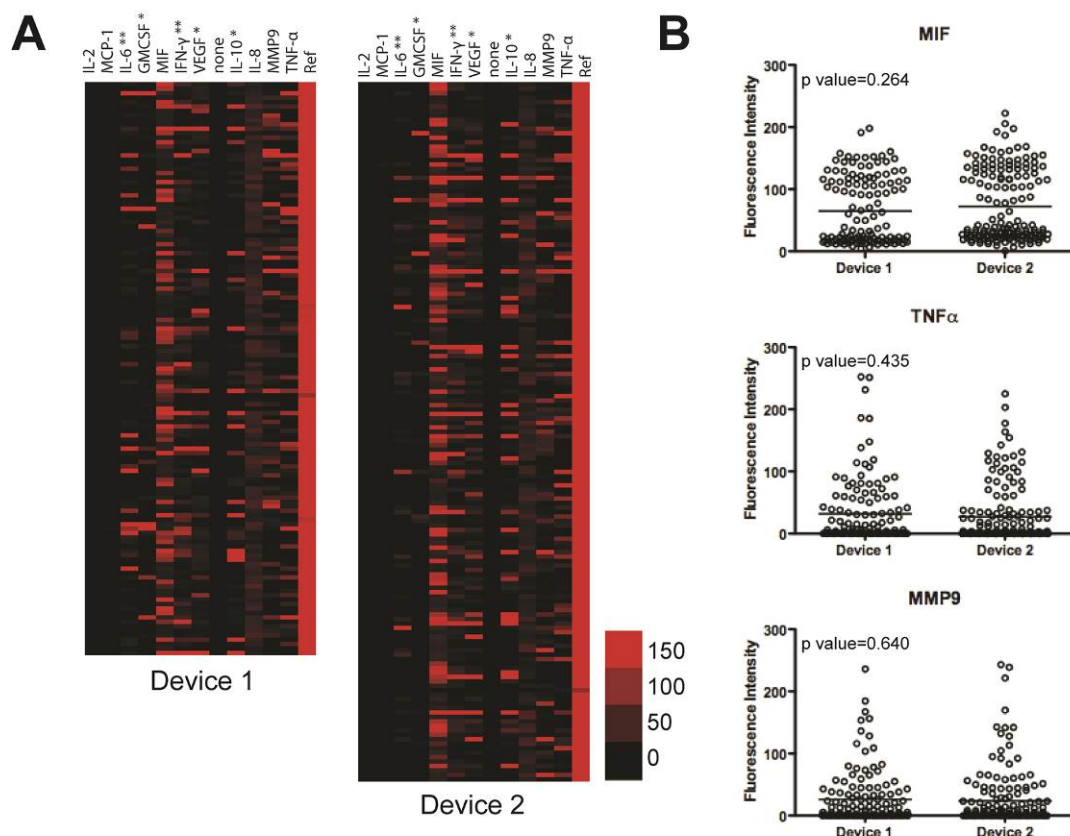

**Figure S4.** Comparison of two data sets from two experiments performed in parallel. All the conditions such as barcode patterning, PDMS-based microfluidic device fabrication, and cell preparation etc for the two devices were the same. (A) Heat maps of the single cell data sets from two devices. Based on the same S/N ratio (4), 9 proteins were detected. It should be noted that the protein profiles are different from the data set used in the main text, which was originated from the non-extracted PDMS device. PDMS is known to leach out toxic material to the solution and this can affect to the cell condition or protein secretion because macrophages are, by nature, highly responsive to their environment. For the main experiment, solvent-extracted PDMS was used to avoid such effects. For some proteins, the signal values are multiplied by 10 (\*) and 100 (\*\*) for the visualization (B) Dot plots for three major proteins. Based on p-values, it can be found that both experimental data sets are statistically close to each other.

## Proteins Fluctuations from Single Cell

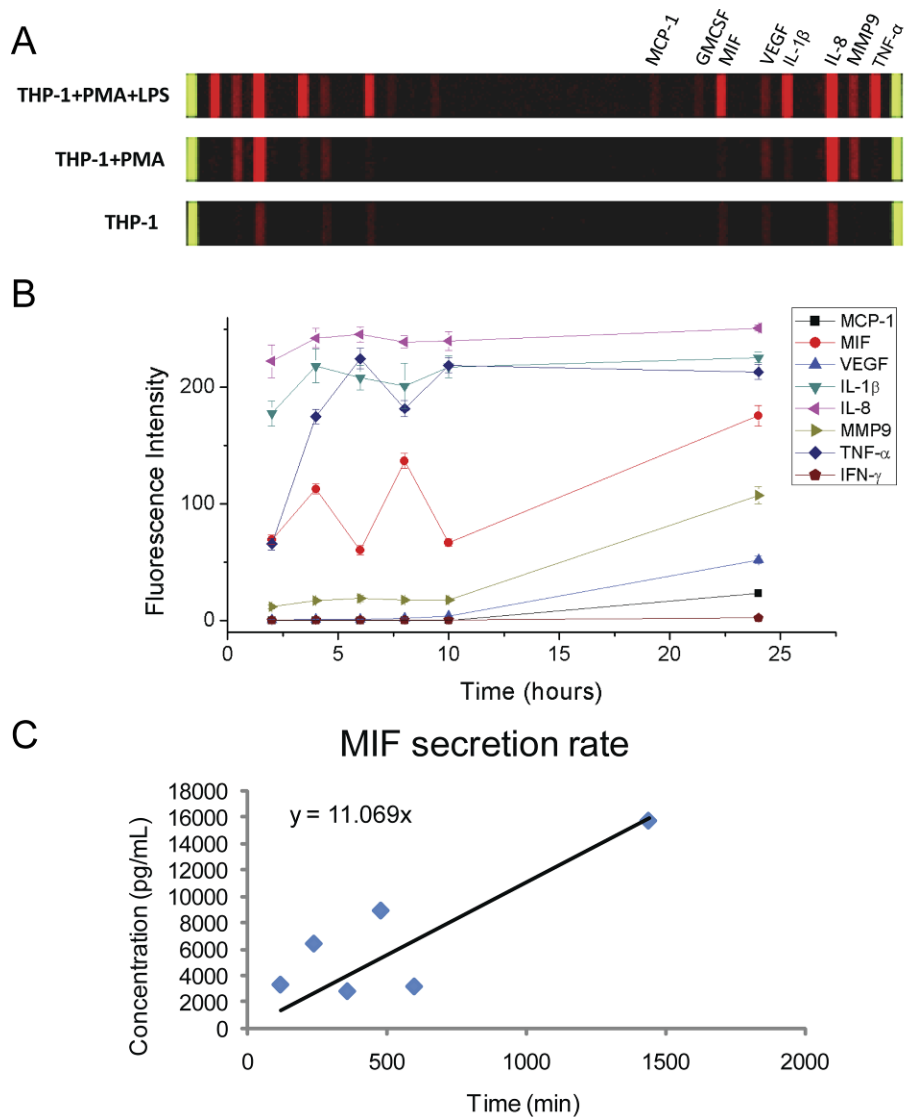

**Figure S5.** PMA and LPS activation and kinetics of protein secretion from activated macrophage cells. (A) Bulk secretion profiles from THP-1 cells under different conditions. PMA treatment induces THP-1 cells to macrophages and LPS treatment emulates innate immune responses against Gram-negative bacteria (B) Quantitation of bulk secretion intensities for the eight selected proteins over 24 hours. The samples were collected at 2, 4, 6, 8, 10, and 24 hours after incubation of PMA/LPS treated cells. The cell density was  $0.3 \times 10^6$  cells/mL, which is a comparable density to a single cell in a chamber of SCBC device. Note that the secretion levels of TNF- $\alpha$  and MIF are oscillatory and anti-correlated. (C) MIF secretion rate based on the assumption of linear time dependence from (B). The secretion rate from the bulk experiment is about 11 pg/mL per min which is about two fold higher than the single cell secretion data from the SCBC device (4.84 pg/mL per min).

## Proteins Fluctuations from Single Cell

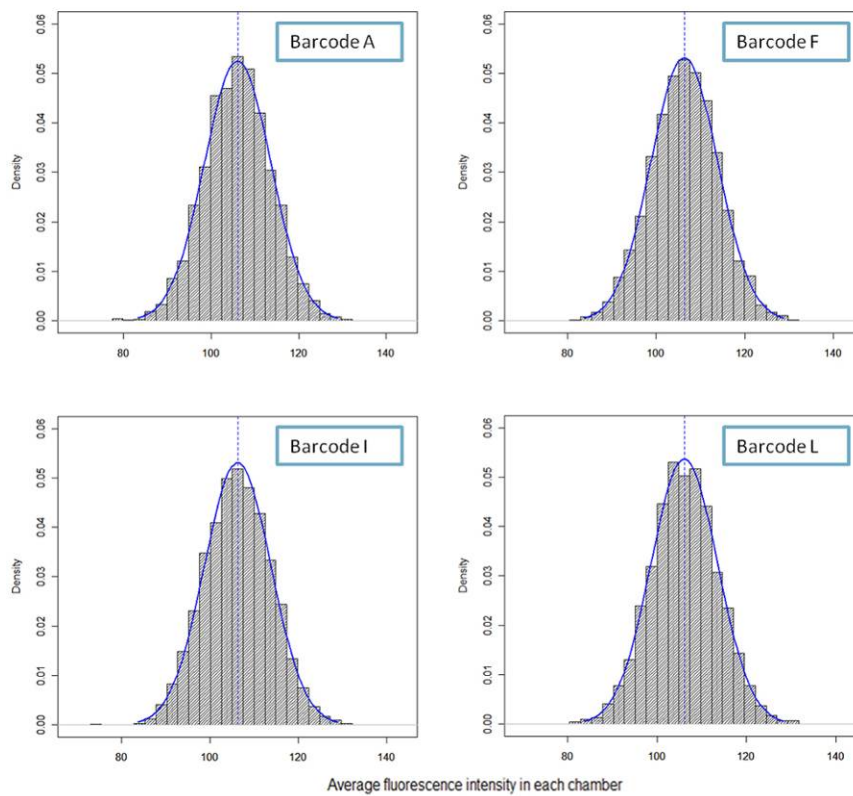

**Figure S6.** Simulated histograms of average intensity from multiple DNA barcode locations. The signal intensities for 5000 single cell data set were obtained by solving a diffusion equation for a randomly located cell. For the barcode variability, the value of 10% was used. The blue curves are the Gaussian fitting of the histogram with sample mean and sample standard deviation from the simulation.

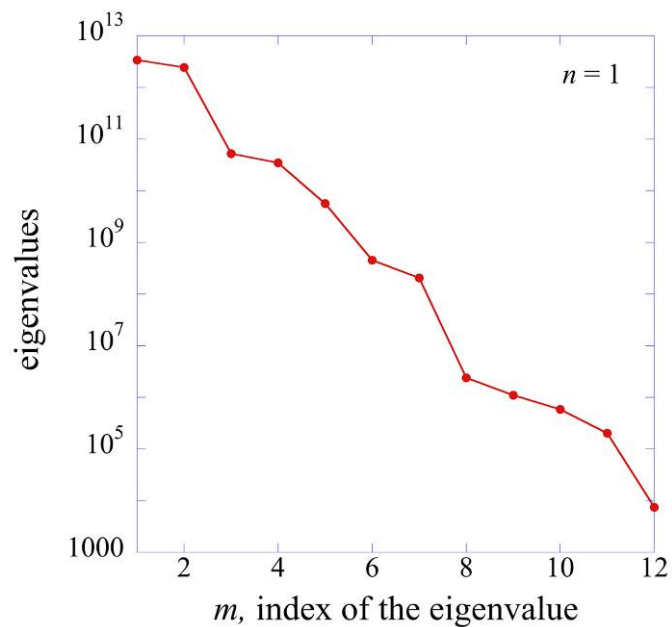

**Figure S7.** The eigenvalues of the covariance matrix, for the experimental data of the main text, in order of decreasing magnitude for samples containing  $n = 1$  cells.

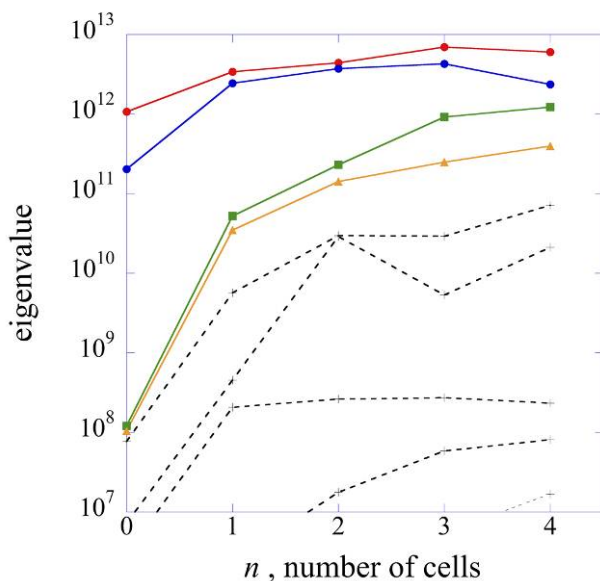

**Figure S8.** The dependence of the dominant eigenvalues of the covariance matrix on the number of cells in the sample. The result for  $n = 0$ , the background, is included to show the influence of the noise. The dashed lines, the fifth and higher eigenvalues are more corrupted by noise.

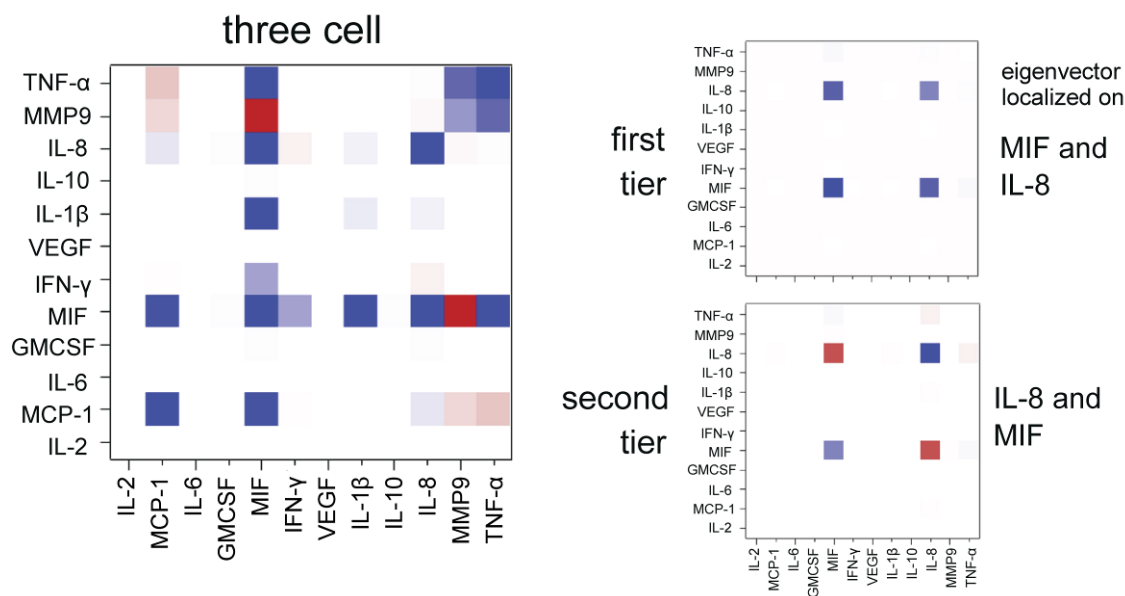

**Figure S9.** Heat map of the covariance matrix (left) and of the contributions to the first two tiers of the network (right) for measurements on chambers containing 3 cells. Similar to the single cell case (Fig. 5), the entries in the tiers are scaled by the size of the eigenvalues. See the spectral representation of the covariance matrix, Eq. S11. The plot at left is the covariance matrix computed from the observed fluctuations in the 3-cell data. The color code is  $-8e+10$  (red) to 0 (white) to  $+8e+10$  (blue). The range is fixed so as to attenuate the effect of the self terms in the covariance matrix. For tier 1 and tier 2, the ranges are  $[-4.3e-12, 4.3e+12]$  and  $[-7e+10, 7e+10]$  respectively. Note that when the numbers of cells per chamber increases, anti-correlations can get washed out.

# Proteins Fluctuations from Single Cell

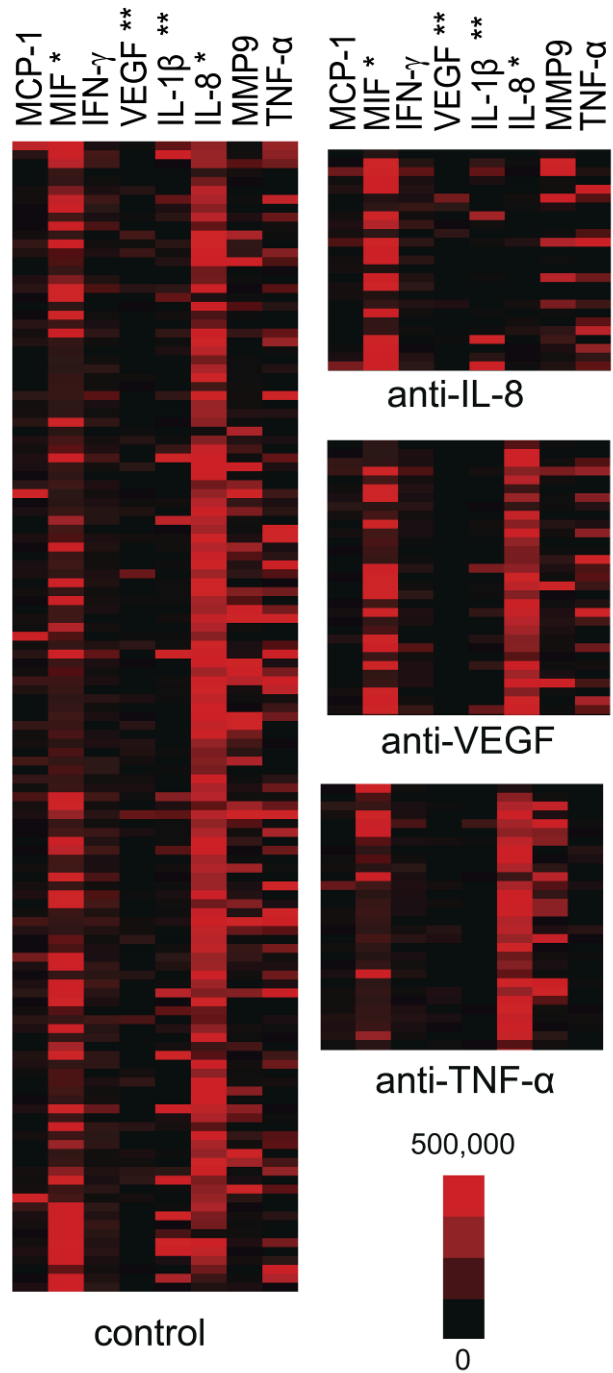

**Figure S10.** Heat map plots showing the secretion profiles of single cells when adding different neutralizing antibodies. For visualization, signals are decreased and amplified 10x for \* and \*\*, respectively.

## Supplementary Tables

**Table S1.** Sequences and terminal functionalization of oligonucleotides\*.

| Name | Sequence                                            |
|------|-----------------------------------------------------|
| A    | 5'- AAA AAA AAA AAA AGT CCT CGC TTC GTC TAT GAG-3'  |
| A'   | 5' NH3-AAA AAA AAA ACT CAT AGA CGA AGC GAG GAC-3'   |
| B    | 5'-AAA AAA AAA AAA AGC CTC ATT GAA TCA TGC CTA -3'  |
| B'   | 5' NH3-AAA AAA AAA ATA GGC ATG ATT CAA TGA GGC -3'  |
| C    | 5'- AAA AAA AAA AAA AGC ACT CGT CTA CTA TCG CTA -3' |
| C'   | 5' NH3-AAA AAA AAA ATA GCG ATA GTA GAC GAG TGC -3'  |
| D    | 5'-AAA AAA AAA AAA AAT GGT CGA GAT GTC AGA GTA -3'  |
| D'   | 5' NH3-AAA AAA AAA ATA CTC TGA CAT CTC GAC CAT -3'  |
| E    | 5'-AAA AAA AAA AAA AAT GTG AAG TGG CAG TAT CTA -3'  |
| E'   | 5' NH3-AAA AAA AAA ATA GAT ACT GCC ACT TCA CAT -3'  |
| F    | 5'-AAA AAA AAA AAA AAT CAG GTA AGG TTC ACG GTA -3'  |
| F'   | 5' NH3-AAA AAA AAA ATA CCG TGA ACC TTA CCT GAT -3'  |
| G    | 5'-AAA AAA AAA AGA GTA GCC TTC CCG AGC ATT-3'       |
| G'   | 5' NH3-AAA AAA AAA AAA TGC TCG GGA AGG CTA CTC-3'   |
| H    | 5'-AAA AAA AAA AAT TGA CCA AAC TGC GGT GCG-3'       |
| H'   | 5' NH3-AAA AAA AAA ACG CAC CGC AGT TTG GTC AAT-3'   |
| I    | 5'-AAA AAA AAA ATG CCC TAT TGT TGC GTC GGA-3'       |
| I'   | 5' NH3-AAA AAA AAA ATC CGA CGC AAC AAT AGG GCA-3'   |
| J    | 5'-AAA AAA AAA ATC TTC TAG TTG TCG AGC AGG-3'       |
| J'   | 5' NH3-AAA AAA AAA ACC TGC TCG ACA ACT AGA AGA-3'   |
| K    | 5'-AAA AAA AAA ATA ATC TAA TTC TGG TCG CGG-3'       |
| K'   | 5' NH3-AAA AAA AAA ACC GCG ACC AGA ATT AGA TTA-3'   |
| L    | 5'-AAA AAA AAA AGT GAT TAA GTC TGC TTC GGC-3'       |
| L'   | 5' NH3-AAA AAA AAA AGC CGA AGC AGA CTT AAT CAC-3'   |
| M    | 5'-AAA AAA AAA AGT CGA GGA TTC TGA ACC TGT-3'       |
| M'   | 5' Cy3-AAA AAA AAA AAC AGG TTC AGA ATC CTC GAC-3'   |

\* all oligonucleotides were synthesized by Integrated DNA Technology (IDT) and purified via high performance liquid chromatography (HPLC).

**Table S2.** Summary of antibodies used for macrophage experiments.

| DNA label | primary antibody (vendor)                 | secondary antibody (vendor)                                 |
|-----------|-------------------------------------------|-------------------------------------------------------------|
| A'        | mouse anti-hu IL-2 (BD Biosciences)       | biotin-labeled mouse anti-hu IL-2 (BD Biosciences)          |
| B'        | mouse anti-hu MCP-1 (eBioscience)         | biotin-labeled armenian hamster anti-hu MCP-1 (eBioscience) |
| C'        | rat anti-hu IL-6 (eBioscience )           | biotin-labeled rat anti-hu IL-6 (eBioscience )              |
| D'        | rat anti-hu GMCSF (Biolegend )            | biotin-labeled rat anti-hu GMCSF (Biolegend )               |
| E'        | goat anti-hu MIF(R&D systems)             | biotin-labeled goat anti-hu MIF(R&D systems)                |
| F'        | mouse anti-hu IFN- $\gamma$ (eBioscience) | biotin-labeled mouse anti-hu IFN- $\gamma$ (eBioscience)    |
| G'        | mouse anti-hu VEGF (R&D systems)          | biotin-labeled goat anti-hu VEGF (R&D systems)              |
| H'        | mouse anti-hu IL-1 $\beta$ (eBioscience)  | biotin-labeled mouse anti-hu IL-1 $\beta$ (eBioscience)     |
| I'        | rat anti-hu IL-10 (eBioscience)           | biotin-labeled rat anti-hu IL-10 (eBioscience)              |
| J'        | mouse anti-hu IL-8 (R&D systems)          | biotin-labeled mouse anti-hu IL-8 (R&D systems)             |
| K'        | mouse anti-hu MMP9 (R&D systems)          | biotin-labeled goat anti-hu MMP9 (R&D systems)              |
| L'        | mouse anti-hu TNF- $\alpha$ (eBioscience) | biotin-labeled mouse anti-hu TNF- $\alpha$ (eBioscience)    |



## Proteins Fluctuations from Single Cell

**Table S3.** Digital data for the fluctuation in protein copy numbers for experiments with 1 cell in the chamber.

| IL-2     | MCP-1    | IL-6     | GMCSF    | MIF      | IFN- $\gamma$ | VEGF     | IL-1 $\beta$ | IL-10    | IL-8     | MMP9     | TNF- $\alpha$ |
|----------|----------|----------|----------|----------|---------------|----------|--------------|----------|----------|----------|---------------|
| 3735.412 | 217395.9 | 13953.23 | 557.1622 | 3809515  | 13624.74      | 201.4036 | 8376.421     | 0        | 1454177  | 3205.591 | 152586.1      |
| 1665.362 | 27307.83 | 104.8926 | 1517.076 | 2820595  | 53647.16      | 22.99382 | 30393.38     | 2225.058 | 1549870  | 8513.336 | 139044.8      |
| 0        | 0        | 5.688741 | 983.9779 | 2039581  | 51073.18      | 5.659558 | 397.6828     | 1712.567 | 1556202  | 75864.65 | 105209.4      |
| 0        | 0        | 4.782456 | 0        | 442693.6 | 0             | 0.336728 | 0            | 0        | 341176.1 | 10460.81 | 39.82124      |
| 0        | 0        | 4.782456 | 0        | 394608.6 | 7158.123      | 0.336728 | 83.72112     | 0        | 1049468  | 5786.696 | 112.4533      |
| 0        | 9036.275 | 4.782456 | 315.5414 | 1182371  | 15521.45      | 2510.404 | 164.3377     | 0        | 2078531  | 530.3467 | 98.55574      |
| 0        | 8562.464 | 22.67125 | 1973.092 | 2340711  | 50886.57      | 0        | 8659.165     | 386.6576 | 1825752  | 3484.746 | 225206        |
| 972.853  | 5136.066 | 45.69175 | 0        | 2903862  | 30000.8       | 1.655758 | 1627.437     | 678.766  | 1357052  | 1609.678 | 487.7715      |
| 0        | 4625.892 | 5.688741 | 162.2633 | 515603.5 | 12411.14      | 258.1623 | 2951.517     | 1069.252 | 2085364  | 18909.8  | 95984.22      |
| 1115.354 | 5639.942 | 25.6359  | 0        | 3794851  | 59631.05      | 5.955249 | 75.74618     | 644.1138 | 829791.9 | 1197.849 | 9267.078      |
| 367.32   | 8562.464 | 0.620442 | 0        | 404940.8 | 0             | 5342.374 | 170.0894     | 425.4534 | 4964304  | 181518.4 | 2001.962      |
| 0        | 40152.21 | 47.5241  | 1517.076 | 3743529  | 8249.956      | 643.5375 | 2935.413     | 1281.727 | 5149720  | 38060.09 | 1084.421      |
| 876.3752 | 20185.95 | 28.71536 | 1658.653 | 665589.7 | 17294.07      | 4591.031 | 732.1417     | 1221.906 | 4543300  | 36619.56 | 127154.3      |
| 0        | 0        | 0        | 0        | 638485.4 | 0             | 0        | 2173.854     | 0        | 2932515  | 408789.6 | 64138.92      |
| 1068.126 | 0        | 13.28018 | 632.2731 | 438114.6 | 0             | 119.5423 | 102.6353     | 0        | 1034324  | 592.5651 | 4161.334      |
| 1575.52  | 19329.17 | 47.5241  | 961.4889 | 1217737  | 21180.92      | 2.07053  | 5.38982      | 813.5973 | 1055366  | 2244.563 | 1780.287      |
| 827.633  | 26895.82 | 175.1502 | 2258.346 | 5831647  | 64318.4       | 2721.671 | 3362.146     | 4140.063 | 3606621  | 5461.672 | 75502.9       |
| 0        | 4625.892 | 4.782456 | 256.7672 | 6562935  | 0             | 1.756733 | 8524.752     | 0        | 174775   | 2301.694 | 98.55574      |
| 0        | 0        | 18.45094 | 286.4852 | 359371.4 | 0             | 572.8267 | 52.38082     | 0        | 3107306  | 65788.63 | 25235.97      |
| 0        | 5136.066 | 0        | 371.9954 | 5772999  | 7715.093      | 0.919755 | 952.1023     | 125.4948 | 589949.5 | 3484.746 | 8.587119      |
| 577.7165 | 27307.83 | 7.645797 | 256.7672 | 481179.4 | 11991.4       | 5.082496 | 91.7772      | 1221.906 | 954720.5 | 1434.076 | 159.007       |
| 0        | 11362.51 | 218.9126 | 681.2702 | 3668936  | 35507.47      | 4.254203 | 3813.608     | 4117.263 | 2589890  | 42622.04 | 86305.23      |
| 474.0248 | 21038.24 | 6.64407  | 505.8466 | 396657.3 | 7715.093      | 1.859546 | 205.0206     | 0        | 8685444  | 1667.948 | 155173.2      |
| 0        | 0        | 336.0215 | 0        | 365278.4 | 0             | 0.606097 | 1608.84      | 174.4034 | 2065560  | 1138.365 | 3733.989      |
| 0        | 0        | 0        | 0        | 328035.4 | 7715.093      | 159.1543 | 138.7292     | 425.4534 | 1067345  | 3484.746 | 95.81771      |
| 0        | 0        | 58.9922  | 961.4889 | 300360.2 | 34353.44      | 0        | 54.93063     | 746.8858 | 1817495  | 2358.739 | 23134.31      |
| 0        | 0        | 4.782456 | 0        | 425186.2 | 7715.093      | 613.1612 | 99.90882     | 386.6576 | 4683202  | 3037.413 | 46.89755      |
| 0        | 0        | 3.928359 | 0        | 445991.3 | 7715.093      | 402.2585 | 0            | 975.2311 | 523909.4 | 6326.138 | 1054.297      |
| 2236.04  | 33403.67 | 476.1208 | 870.3418 | 435981.4 | 74992.86      | 23.9095  | 3930.914     | 1986.093 | 11697012 | 9358.114 | 8317287       |
| 0        | 8085.346 | 36.88775 | 453.3645 | 332604.1 | 11991.4       | 86.2306  | 113.6166     | 1370.279 | 1559706  | 7130.545 | 1958.179      |
| 1620.52  | 9974.818 | 0        | 286.4852 | 362920.9 | 7158.123      | 0.336728 | 42.31677     | 713.014  | 1569342  | 22053.76 | 23001.06      |
| 198.7022 | 28129.56 | 104.8926 | 582.4318 | 5431280  | 38632.32      | 0.534271 | 503.3473     | 746.8858 | 1414076  | 3818.009 | 82.34883      |
| 0        | 0        | 13.28018 | 0        | 294489.8 | 0             | 278.2761 | 39.8375      | 0        | 96873.01 | 181570.6 | 0             |
| 0        | 15851.76 | 13.28018 | 0        | 569708.6 | 11125.54      | 2369.121 | 328.8863     | 386.6576 | 1292647  | 23316.12 | 12607.48      |
| 1843.259 | 8562.464 | 86.41712 | 194.848  | 775007.6 | 19615.08      | 0.336728 | 4396.839     | 0        | 2386454  | 56608.75 | 570.4367      |
| 474.0248 | 16291.26 | 84.19013 | 870.3418 | 3567046  | 57034.26      | 44.96208 | 112244.6     | 1130.88  | 3238520  | 3707.119 | 85922.27      |
| 0        | 12275.83 | 14.52122 | 681.2702 | 446942.7 | 8249.956      | 3059.87  | 44.81139     | 425.4534 | 3127064  | 270629.6 | 16913.92      |
| 0        | 5639.942 | 65.01849 | 0        | 362459.2 | 0             | 0        | 16.1095      | 0        | 2971267  | 3429.024 | 115.2728      |
| 0        | 34605.82 | 175.1502 | 286.4852 | 499008.3 | 18309.28      | 152.4368 | 184.5588     | 425.4534 | 1011213  | 135792.6 | 1097.382      |
| 526.1976 | 584810   | 13.28018 | 0        | 308498.5 | 9264.625      | 483.3776 | 0            | 0        | 1509316  | 1052286  | 49352.54      |
| 421.1059 | 4625.892 | 0        | 531.6397 | 277526.7 | 17636.16      | 295.7684 | 824.1178     | 1684.681 | 1979177  | 42077.15 | 14565.16      |



# Proteins Fluctuations from Single Cell

|          |          |          |          |          |          |          |          |          |          |          |          |
|----------|----------|----------|----------|----------|----------|----------|----------|----------|----------|----------|----------|
| 924.7744 | 12275.83 | 114.5543 | 479.7625 | 451511.5 | 25255.09 | 1990.09  | 196.223  | 573.4616 | 2977232  | 121849.1 | 29473.5  |
| 0        | 0        | 5.688741 | 286.4852 | 1616413  | 24415.08 | 53.64644 | 21718.77 | 0        | 1961863  | 5948.816 | 16.0508  |
| 0        | 1935.839 | 22.67125 | 162.2633 | 537180.3 | 0        | 1.556662 | 426.2234 | 678.766  | 1662376  | 3928.711 | 1846405  |
| 4097.416 | 15410.74 | 6.64407  | 916.1621 | 627149.3 | 15153.07 | 950.0875 | 661.5037 | 911.38   | 4734071  | 15793.97 | 633893.1 |
| 0        | 5639.942 | 18.45094 | 0        | 3734680  | 19933.81 | 71.75808 | 611.5641 | 1877.786 | 1963379  | 160882.2 | 12793.76 |
| 0        | 0        | 45.69175 | 286.4852 | 472151   | 7715.093 | 188.2966 | 86.39776 | 0        | 2563383  | 70281.5  | 27115.65 |
| 138.713  | 12729.29 | 27.16157 | 128.1625 | 510521.3 | 9748.657 | 0.534271 | 363.1055 | 713.014  | 7637057  | 22154.85 | 306664.8 |
| 526.1976 | 14077.98 | 47.5241  | 753.3682 | 385982.2 | 17636.16 | 9497.397 | 81.05349 | 713.014  | 1650511  | 36569.86 | 69227.5  |
| 0        | 0        | 3.928359 | 505.8466 | 4597800  | 21486.18 | 55.44104 | 378.7795 | 0        | 4705311  | 1492.748 | 4042.245 |
| 474.0248 | 8562.464 | 13.28018 | 286.4852 | 415863.4 | 7158.123 | 0        | 304.2398 | 1656.69  | 6712149  | 124417.6 | 104764.8 |
| 0        | 4625.892 | 49.37952 | 870.3418 | 3610659  | 11125.54 | 308.8587 | 335.0802 | 1543.606 | 1731368  | 67269.56 | 273.0328 |
| 0        | 0        | 0        | 0        | 497690.4 | 12411.14 | 1.964157 | 57.49294 | 0        | 1609086  | 450905.5 | 109102.7 |
| 2149.562 | 10439.91 | 5.688741 | 286.4852 | 493432.2 | 0        | 95.38698 | 800.1525 | 0        | 2319845  | 933080.9 | 468816.9 |
| 0        | 2499.366 | 0        | 0        | 1938229  | 11563.1  | 15.08493 | 167.2109 | 1486.351 | 1882943  | 6809.424 | 1024.341 |
| 421.1059 | 260961.8 | 27.16157 | 1028.626 | 631535.9 | 0        | 297.85   | 213.8589 | 537.3803 | 1335228  | 1018.815 | 12.21319 |
| 0        | 7604.672 | 47.5241  | 194.848  | 414552.4 | 20562.75 | 3358.884 | 267.679  | 1656.69  | 4826026  | 12493.18 | 65787.75 |
| 778.5221 | 27307.83 | 339.5008 | 1638.592 | 3964841  | 84043.16 | 10.19566 | 170693.7 | 3082.111 | 4250173  | 17635.86 | 346394   |
| 0        | 4625.892 | 0        | 315.5414 | 480143.5 | 15521.45 | 401.1044 | 196.223  | 2225.058 | 3515798  | 580887   | 11928.38 |
| 0        | 8562.464 | 18.45094 | 286.4852 | 658884.1 | 7158.123 | 1.179999 | 150.0535 | 537.3803 | 1652656  | 454906.5 | 113008.1 |
| 474.0248 | 48688.48 | 15.79737 | 777.063  | 479056.9 | 15153.07 | 11.81997 | 621.5163 | 2039.74  | 4603005  | 201019.8 | 340191.5 |
| 474.0248 | 20612.64 | 6.64407  | 286.4852 | 436080.6 | 0        | 1.859546 | 234.6332 | 2012.957 | 6917958  | 11296.85 | 215980.3 |
| 0        | 0        | 768.0874 | 286.4852 | 373315   | 26079.52 | 1437.645 | 199.1509 | 678.766  | 2261670  | 2130.037 | 10466.12 |
| 0        | 0        | 0        | 0        | 426020.1 | 7158.123 | 2.743952 | 161.4698 | 0        | 3933389  | 4369.751 | 49058.97 |
| 0        | 0        | 189.3848 | 557.1622 | 494271.9 | 15521.45 | 494.498  | 127.5026 | 71.49773 | 3800164  | 477015.4 | 103268.1 |
| 1068.126 | 42500.29 | 5.688741 | 0        | 443142.7 | 0        | 2610.429 | 135.9132 | 220.2761 | 2342101  | 688400.6 | 12.21319 |
| 0        | 6631.472 | 19.82653 | 0        | 574020.6 | 12822.93 | 10.3724  | 175.8619 | 879.0676 | 4074696  | 105807.8 | 1513.189 |
| 972.853  | 10439.91 | 10.90809 | 729.5097 | 284256.4 | 18640.59 | 2235.697 | 133.1033 | 0        | 1470217  | 53399.89 | 4002.718 |
| 0        | 0        | 13.28018 | 0        | 597667.5 | 0        | 2019.485 | 264.6556 | 306.1297 | 1194410  | 29141.91 | 480.3807 |
| 0        | 51365.65 | 145.1361 | 1246.065 | 405806.5 | 32699.9  | 856.1518 | 113.6166 | 1959.145 | 1258039  | 183346.9 | 1417.034 |
| 0        | 729.7022 | 0        | 256.7672 | 602511.6 | 31733.5  | 0        | 234.6332 | 0        | 1122269  | 898.3988 | 400.546  |
| 1485.024 | 41719.38 | 139.8782 | 453.3645 | 444591   | 7158.123 | 885.0224 | 138.7292 | 1628.589 | 2793823  | 3540.416 | 27481.96 |
| 526.1976 | 6138.223 | 27.16157 | 0        | 465292.2 | 14400.48 | 1403.802 | 102.6353 | 746.8858 | 1844275  | 18451.63 | 97125.55 |
| 2192.854 | 60050.81 | 285.2598 | 557.1622 | 3976269  | 52552.65 | 235.1851 | 12868.12 | 1486.351 | 2056078  | 6272.314 | 6856.5   |
| 0        | 10439.91 | 0        | 128.1625 | 5629496  | 8249.956 | 0.399418 | 1762.11  | 678.766  | 813978.6 | 163717.2 | 92940.02 |
| 2535.544 | 14523.91 | 114.5543 | 344.0223 | 1484329  | 26621.01 | 8678.123 | 8057.573 | 2661.458 | 1986914  | 525123.6 | 889781.5 |
| 0        | 4108.532 | 0        | 557.1622 | 443841.6 | 7715.093 | 1.179999 | 216.8138 | 1281.727 | 1438747  | 72010.22 | 3496.753 |
| 421.1059 | 4625.892 | 55.08115 | 453.3645 | 533679.1 | 45692.16 | 1450.532 | 385.0693 | 463.4456 | 1859549  | 8089.271 | 175397.8 |
| 924.7744 | 0        | 27.16157 | 681.2702 | 2819971  | 22977.18 | 25.30396 | 258.6201 | 2836.369 | 2894811  | 40590.36 | 774.8536 |
| 1439.516 | 5136.066 | 47.5241  | 0        | 2087753  | 52000.61 | 0.399418 | 7422.418 | 879.0676 | 3000134  | 5786.696 | 97961.85 |
| 526.1976 | 0        | 0        | 162.2633 | 528450.2 | 11991.4  | 59.08624 | 22.98716 | 463.4456 | 1749215  | 3596.034 | 624.2794 |
| 577.7165 | 9506.996 | 49.37952 | 0        | 503131.4 | 15521.45 | 116.0933 | 837.8488 | 220.2761 | 1903608  | 164594.6 | 2006.839 |
| 577.7165 | 0        | 5.688741 | 453.3645 | 6660777  | 58080.71 | 120.3132 | 404.0062 | 0        | 1578115  | 1078.692 | 323.6175 |
| 0        | 11362.51 | 0        | 128.1625 | 440302   | 9264.625 | 114.9509 | 273.7368 | 813.5973 | 1578115  | 12129.72 | 1040989  |
| 1575.52  | 19329.17 | 325.6539 | 1638.592 | 4924300  | 64154.29 | 340.5053 | 1318.723 | 2861.155 | 2672000  | 23366.56 | 306.578  |

## Proteins Fluctuations from Single Cell

|          |          |          |          |          |          |          |          |          |          |          |          |
|----------|----------|----------|----------|----------|----------|----------|----------|----------|----------|----------|----------|
| 0        | 0        | 24.13892 | 0        | 6851805  | 53465.61 | 5.513485 | 638.1433 | 0        | 1028638  | 127948.9 | 12200.28 |
| 474.0248 | 9036.275 | 221.941  | 286.4852 | 458783.7 | 20873.14 | 49.24328 | 322.7051 | 1850.488 | 2457942  | 22811.51 | 822556.8 |
| 3613.793 | 57047.96 | 172.3469 | 938.885  | 406672.9 | 47264.38 | 865.9889 | 1690.864 | 2172.481 | 3502255  | 843555.9 | 353763.6 |
| 0        | 22308.79 | 60.97992 | 0        | 369312.3 | 19933.81 | 814.9924 | 119.1506 | 975.2311 | 2229100  | 92908.36 | 75331.28 |
| 2062.643 | 5639.942 | 0        | 194.848  | 828096.2 | 7715.093 | 3451.146 | 105.3695 | 463.4456 | 2062203  | 2529.389 | 49.30233 |
| 0        | 4625.892 | 150.4565 | 194.848  | 606027.9 | 15521.45 | 48.08955 | 732.1417 | 644.1138 | 2205137  | 44305.43 | 112117.4 |
| 876.3752 | 109736.4 | 15.79737 | 656.8714 | 4333366  | 13227.3  | 9.498279 | 3109.17  | 2910.581 | 1557792  | 40044.93 | 8399.296 |
| 474.0248 | 14077.98 | 58.9922  | 1050.792 | 4158207  | 40779.49 | 0.837598 | 2139.122 | 713.014  | 1602325  | 18247.85 | 13988.05 |
| 0        | 4625.892 | 9.77966  | 938.885  | 427984.9 | 28984.83 | 2539.309 | 133.1033 | 813.5973 | 3538045  | 6056.756 | 99712.96 |
| 474.0248 | 15851.76 | 97.82923 | 315.5414 | 3058525  | 52552.65 | 5.224942 | 344.3945 | 678.766  | 1596288  | 1434.076 | 17010.92 |
| 1620.52  | 30983.19 | 164.0253 | 2444.257 | 3783288  | 27421.74 | 8.150933 | 20591.01 | 713.014  | 1238515  | 126636.5 | 294604.8 |
| 0        | 5639.942 | 6.64407  | 0        | 4829314  | 14779.51 | 0        | 438.9771 | 0        | 8394607  | 1375.257 | 12.21319 |
| 0        | 9036.275 | 86.41712 | 1718.527 | 699222.5 | 0        | 0        | 8090.773 | 0        | 946538.8 | 1018.815 | 246.7378 |
| 421.1059 | 29356.69 | 57.02586 | 656.8714 | 427051.1 | 49758.73 | 5895.509 | 7.430834 | 713.014  | 855150.1 | 715.8439 | 12943.31 |
| 972.853  | 16729.29 | 124.4873 | 557.1622 | 3157311  | 24131.41 | 26.96196 | 2270.716 | 125.4948 | 1429803  | 10251.26 | 2675.917 |
| 474.0248 | 0        | 27.16157 | 344.0223 | 421026.8 | 33885.67 | 0.336728 | 158.6074 | 813.5973 | 4493846  | 3205.591 | 4785.501 |
| 0        | 0        | 4.782456 | 0        | 1735160  | 0        | 0        | 1064.458 | 1600.377 | 491041.6 | 56904.9  | 28.54088 |
| 924.7744 | 21462.78 | 329.098  | 1797.669 | 10572470 | 36640.69 | 87.27182 | 951072.8 | 2012.957 | 717967.5 | 5786.696 | 50463.01 |
| 1255.571 | 16729.29 | 36.88775 | 916.1621 | 387730.2 | 35507.47 | 12.37785 | 172.9731 | 943.4302 | 3107306  | 9305.439 | 99116.28 |
| 0        | 3047.191 | 0        | 0        | 601108.5 | 0        | 1098.532 | 62.65337 | 346.9365 | 1429264  | 2015.138 | 0        |
| 827.633  | 1935.839 | 22.67125 | 0        | 609026.5 | 16243.7  | 3776.053 | 49.844   | 644.1138 | 2839583  | 5948.816 | 10466.12 |
| 0        | 0        | 45.69175 | 0        | 529102.3 | 7715.093 | 148.7002 | 164.3377 | 0        | 2739500  | 135792.6 | 454.6833 |
| 0        | 5639.942 | 19.82653 | 800.6015 | 399905.3 | 11125.54 | 61.55719 | 99.90882 | 1069.252 | 3152475  | 3484.746 | 192.6131 |
| 1975.261 | 17165.9  | 322.2216 | 1203.28  | 10565748 | 90563.8  | 9.155434 | 41511.63 | 2959.817 | 2157535  | 136249.1 | 5338.093 |
| 0        | 0        | 18.45094 | 1246.065 | 476216.6 | 0        | 0.399418 | 1553.213 | 0        | 1844720  | 82939.55 | 2389.394 |
| 0        | 0        | 17.10759 | 531.6397 | 3728800  | 39283.39 | 2566.026 | 1008.095 | 0        | 747662.7 | 1667.948 | 230.5624 |
| 628.6544 | 9974.818 | 15.79737 | 426.6258 | 488669.7 | 30997.64 | 130.4801 | 65.2507  | 1038.132 | 4037787  | 39400.11 | 71229.18 |
| 924.7744 | 0        | 5.688741 | 0        | 1560874  | 36640.69 | 4.801319 | 54.93063 | 0        | 1778135  | 8724.937 | 77056.37 |
| 0        | 0        | 27.16157 | 0        | 382589.2 | 5961.002 | 1493.194 | 347.5054 | 0        | 1500979  | 607501.3 | 327.046  |
| 972.853  | 0        | 0        | 226.2736 | 441546.9 | 7715.093 | 786.2589 | 110.8603 | 678.766  | 7130236  | 167126.3 | 55851.67 |
| 526.1976 | 11362.51 | 3.130261 | 1203.28  | 1356636  | 21180.92 | 2759.997 | 3129.465 | 975.2311 | 2758719  | 3818.009 | 146319.6 |
| 577.7165 | 6631.472 | 19.82653 | 2201.941 | 5878268  | 13624.74 | 3241.913 | 37543.28 | 1221.906 | 1173170  | 13477.1  | 220.957  |
| 0        | 11362.51 | 0        | 315.5414 | 486844   | 27948.27 | 0        | 255.6081 | 463.4456 | 1388172  | 522389.9 | 78625.91 |
| 0        | 635058.1 | 6.64407  | 0        | 545876.8 | 7715.093 | 1100.19  | 190.3813 | 0        | 1518652  | 28391.09 | 109.6469 |
| 256.4187 | 46379.67 | 53.15834 | 729.5097 | 3301742  | 32699.9  | 4.389042 | 359.9795 | 1006.795 | 1864545  | 5353.088 | 227.3521 |
| 577.7165 | 13630.28 | 14.52122 | 2107.237 | 3806473  | 22683.47 | 121.4725 | 96650.04 | 1543.606 | 1174095  | 9252.748 | 26620.53 |
| 924.7744 | 10439.91 | 47.5241  | 453.3645 | 3281029  | 44088.98 | 0.016533 | 477.4821 | 346.9365 | 1063941  | 2812.305 | 447.3908 |
| 5587.157 | 5136.066 | 24.13892 | 681.2702 | 3016496  | 29240.69 | 47.22998 | 5719.854 | 425.4534 | 105126.8 | 6056.756 | 0        |
| 474.0248 | 8562.464 | 36.88775 | 1895.558 | 4112702  | 22683.47 | 3.224364 | 87695.31 | 644.1138 | 3622850  | 18094.94 | 112883.1 |
| 2955.955 | 18035.05 | 57.02586 | 2088.188 | 3559334  | 27421.74 | 17.95405 | 37266.68 | 1656.69  | 2244932  | 5786.696 | 952.3013 |
| 5355.51  | 8562.464 | 0        | 0        | 2892800  | 14015.67 | 128.5041 | 1271.685 | 0        | 1603673  | 9884.013 | 30912.89 |
| 0        | 0        | 14.52122 | 52.05951 | 831973.3 | 8249.956 | 518.8942 | 141.5514 | 0        | 1042440  | 1609.678 | 306814.1 |
| 0        | 4625.892 | 67.06888 | 557.1622 | 3166646  | 20249.67 | 2.288425 | 18257.35 | 71.49773 | 462439.1 | 2130.037 | 187929.7 |
| 5970.693 | 18035.05 | 90.92703 | 1160.163 | 2856820  | 31244.01 | 23.67953 | 522.8445 | 1795.612 | 215604.4 | 14560.51 | 4241.145 |

## Proteins Fluctuations from Single Cell

**Table S4.** Signal-to-noise ratio (S/N) for single cells in SCBC measurements

| IL-2 | MCP-1 | IL-6 | GMCSF | MIF    | IFN- $\gamma$ | VEGF | IL-1 $\beta$ | IL-10 | IL-8   | MMP9  | TNF- $\alpha$ |
|------|-------|------|-------|--------|---------------|------|--------------|-------|--------|-------|---------------|
| 1.0  | 4.7   | 3.6  | 1.4   | 1381.1 | 4.3           | 77.3 | 94.7         | 1.8   | 2622.4 | 119.5 | 410.7         |

**Table S5.** Parameters utilized for the protein assay calibration curve

|               | A1    |       | A2    |       | x0          |          | p       |         | Statistics      |               |
|---------------|-------|-------|-------|-------|-------------|----------|---------|---------|-----------------|---------------|
|               | Value | Error | Value | Error | Value       | Error    | Value   | Error   | Reduced Chi-Sqr | Adj. R-Square |
| IL-2          | 0     | 0     | 256   | 0     | 7659.58168  | 973.0838 | 1.12824 | 0.16788 | 91.39131        | 0.99224       |
| MCP-1         | 0     | 0     | 256   | 0     | 65733.51686 | 4770.5   | 1.12607 | 0.09607 | 29.62623        | 0.99578       |
| IL-6          | 0     | 0     | 256   | 0     | 16231.59942 | 4515.94  | 0.67887 | 0.12265 | 243.09932       | 0.95697       |
| GMCSF         | 0     | 0     | 256   | 0     | 2451.99685  | 295.3281 | 1.2195  | 0.13013 | 72.59138        | 0.99458       |
| MIF           | 0     | 0     | 256   | 0     | 7892.74068  | 483.8218 | 1.14428 | 0.07578 | 20.31714        | 0.99821       |
| IFN- $\gamma$ | 0     | 0     | 256   | 0     | 14549.5316  | 2773.804 | 1.57222 | 0.26181 | 172.2368        | 0.98713       |
| VEGF          | 0     | 0     | 256   | 0     | 1687.9445   | 225.4782 | 0.69008 | 0.05631 | 58.49911        | 0.99513       |
| IL-1 $\beta$  | 0     | 0     | 256   | 0     | 2137.44388  | 208.9672 | 0.89593 | 0.07185 | 41.21361        | 0.99694       |
| IL-10         | 0     | 0     | 256   | 0     | 3961.03661  | 328.4038 | 1.23209 | 0.08611 | 33.93572        | 0.99669       |
| IL-8          | 0     | 0     | 256   | 0     | 1255.89317  | 225.9207 | 1.23262 | 0.19534 | 161.8703        | 0.98686       |
| MMP9          | 0     | 0     | 256   | 0     | 70537.40022 | 1584.696 | 1.062   | 0.02495 | 2.60945         | 0.99961       |
| TNF- $\alpha$ | 0     | 0     | 256   | 0     | 4126.15703  | 661.2747 | 0.81683 | 0.09483 | 99.72583        | 0.99185       |

**Table S6:** Values of parameters used in simulation

|                              |                                                                         |
|------------------------------|-------------------------------------------------------------------------|
| Chamber size                 | 2000 $\mu\text{m}$ $\times$ 100 $\mu\text{m}$ $\times$ 18 $\mu\text{m}$ |
| Cell diameter                | 10 $\mu\text{m}$                                                        |
| Diffusion Coefficient(11)    | $10^{-6}$ $\text{cm}^2/\text{sec}$                                      |
| Protein secretion rate (MIF) | 0.065 nM/min                                                            |
| Molecular weight             | 12500 Da                                                                |

**Table S7:** The coefficients of variation for each of the assayed proteins from single cell experiments. The experimental CVs are estimated from the Monte Carlo simulations. The biological CVs, which clearly dominate the experiment, are calculated from  $CV_{\text{assay}} = (CV_{\text{system}}^2 + CV_{\text{biological}}^2)^{1/2}$ .

| Barcode/Protein   | Experimental CV (%) | Assay CV (%) | Biological CV (%) |
|-------------------|---------------------|--------------|-------------------|
| B / MCP-1         | 7.12                | 380.4        | 380.3             |
| E / MIF           | 7.05                | 55.2         | 54.7              |
| F / IFN- $\gamma$ | 7.04                | 131.5        | 131.3             |
| G / VEGF          | 7.03                | 149.7        | 149.5             |
| H / IL-1 $\beta$  | 7.02                | 300.6        | 300.5             |
| J / IL-8          | 7.00                | 14.4         | 12.6              |
| K / MMP9          | 6.98                | 192.6        | 192.5             |
| L / TNF- $\alpha$ | 6.97                | 132.9        | 132.7             |

## Proteins Fluctuations from Single Cell

**Table S8:** Digital representation of the covariance matrix for 1 cell measurements

| COV           | IL-2      | MCP-1     | IL-6      | GMCSF     | MIF       | IFN- $\gamma$ | VEGF      | IL-1 $\beta$ | IL-10     | IL-8      | MMP9      | TNF- $\alpha$ |
|---------------|-----------|-----------|-----------|-----------|-----------|---------------|-----------|--------------|-----------|-----------|-----------|---------------|
| IL-2          | 1.18E+06  | -27830    | 7966.7    | 1.34E+05  | 2.30E+08  | 4.10E+06      | 85756     | 1.27E+06     | 1.60E+05  | -1.06E+08 | 1.50E+07  | 2.31E+07      |
| MCP-1         | -27830    | 6.34E+09  | -1.83E+05 | -1.14E+06 | -9.54E+09 | -9.51E+07     | 6.10E+05  | -3.31E+07    | -2.52E+06 | -8.51E+09 | 4.21E+09  | -7.34E+08     |
| IL-6          | 7966.7    | -1.83E+05 | 9050.5    | 11507     | 1.56E+07  | 5.89E+05      | 734.25    | 4.20E+05     | 24714     | -81623    | -7.38E+05 | 1.04E+06      |
| GMCSF         | 1.34E+05  | -1.14E+06 | 11507     | 3.39E+05  | 3.75E+08  | 3.97E+06      | 53462     | 5.71E+06     | 2.07E+05  | 1.05E+07  | -1.66E+07 | 1.75E+06      |
| MIF           | 2.30E+08  | -9.54E+09 | 1.56E+07  | 3.75E+08  | 3.12E+12  | 1.48E+10      | -4.32E+08 | 1.19E+10     | 3.35E+08  | -4.33E+11 | -7.53E+10 | -5.22E+10     |
| IFN- $\gamma$ | 4.10E+06  | -9.51E+07 | 5.89E+05  | 3.97E+06  | 1.48E+10  | 3.09E+08      | -2.28E+05 | 1.40E+08     | 5.83E+06  | -1.70E+09 | -5.01E+08 | -1.00E+08     |
| VEGF          | 85756     | 6.10E+05  | 734.25    | 53462     | -4.32E+08 | -2.28E+05     | 2.48E+06  | -2.65E+06    | 1.04E+05  | 9.34E+07  | 2.92E+07  | 2.59E+07      |
| IL-1 $\beta$  | 1.27E+06  | -3.31E+07 | 4.20E+05  | 5.71E+06  | 1.19E+10  | 1.40E+08      | -2.65E+06 | 4.78E+08     | 4.46E+06  | 1.86E+09  | -4.08E+08 | 3.16E+08      |
| IL-10         | 1.60E+05  | -2.52E+06 | 24714     | 2.07E+05  | 3.35E+08  | 5.83E+06      | 1.04E+05  | 4.46E+06     | 7.39E+05  | 2.20E+08  | -5.64E+06 | 2.92E+07      |
| IL-8          | -1.06E+08 | -8.51E+09 | -81623    | 1.05E+07  | -4.33E+11 | -1.70E+09     | 9.34E+07  | 1.86E+09     | 2.20E+08  | 2.73E+12  | 7.05E+09  | 3.56E+10      |
| MMP9          | 1.50E+07  | 4.21E+09  | -7.38E+05 | -1.66E+07 | -7.53E+10 | -5.01E+08     | 2.92E+07  | -4.08E+08    | -5.64E+06 | 7.05E+09  | 3.70E+10  | 5.25E+09      |
| TNF- $\alpha$ | 2.31E+07  | -7.34E+08 | 1.04E+06  | 1.75E+06  | -5.22E+10 | -1.00E+08     | 2.59E+07  | 3.16E+08     | 2.92E+07  | 3.56E+10  | 5.25E+09  | 5.26E+10      |

## Supplementary Methods References

1. Fan, R., O. Vermesh, A. Srivastava, B. K. H. Yen, L. D. Qin, H. Ahmad, G. A. Kwong, C. C. Liu, J. Gould, L. Hood, and J. R. Heath. 2008. Integrated barcode chips for rapid, multiplexed analysis of proteins in microliter quantities of blood. *Nature Biotechnology* 26:1373-1378.
2. Shin, Y. S., H. Ahmad, Q. Shi, H. Kim, T. A. Pascal, R. Fan, W. A. Goddard, 3rd, and J. R. Heath. 2010. Chemistries for patterning robust DNA microbarcodes enable multiplex assays of cytoplasm proteins from single cancer cells. *Chemphyschem* 11:3063-3069.
3. Quake, S. R., and A. Scherer. 2000. From micro- to nanofabrication with soft materials. *Science* 290:1536-1540.
4. Millet, L. J., M. E. Stewart, J. V. Sweedler, R. G. Nuzzo, and M. U. Gillette. 2007. Microfluidic devices for culturing primary mammalian neurons at low densities. *Lab on a Chip* 7:987-994.
5. Lee, J. N., C. Park, and G. M. Whitesides. 2003. Solvent compatibility of poly(dimethylsiloxane)-based microfluidic devices. *Anal Chem* 75:6544-6554.
6. Levine, R. D. 2001. How large is 'large' for a thermodynamic-like behavior. *Physica E* 9:591-599.
7. Callen, H. B. 1985. *Thermodynamics and an Introduction to Thermostatistics*. Wiley, NY.
8. Mayer, J. E., and M. G. Mayer. 1966. *Statistical mechanics*. Wiley, New York.
9. Alhassid, Y., and R. D. Levine. 1980. Experimental and Inherent Uncertainties in the Information Theoretic Approach. *Chemical Physics Letters* 73:16-20.
10. Bellman, R. 1970. *Introduction to Matrix Analysis*. McGraw-Hill, New York.
11. Han, Q., E. M. Bradshaw, B. Nilsson, D. A. Hafler, and J. C. Love. 2010. Multidimensional analysis of the frequencies and rates of cytokine secretion from single cells by quantitative microengraving. *Lab on a Chip* 10:1391-1400.
